# Supplementary material
Source: PubMed Central journal article supplement (PMC5293115)

1 **Supporting Information**

2

3 **Classification**

4 BIOLOGICAL SCIENCES: Microbiology

5

6 **Title**

7

8 **Pathogen-mediated manipulation of arthropod microbiota to promote infection**

9

10 **Authors**

11

12 Nabil M. Abraham <sup>1,2F</sup>, Lei Liu <sup>1F\*</sup>, Brandon L. Jutras <sup>2,3</sup>, Akhilesh K. Yadav <sup>4</sup>, Sukanya  
13 Narasimhan <sup>1</sup>, Vissagan Gopalakrishnan <sup>1,2,5</sup>, Juliana M. Ansari <sup>6</sup>, Kimberly K. Jefferson  
14 <sup>7</sup>, Felipe Cava <sup>4</sup>, Christine Jacobs-Wagner <sup>2,3,8,9</sup>, Erol Fikrig <sup>1,2,9\*</sup>

15 **Supporting Information- Materials and Methods**

16

17 **Mice and ticks**

18

19 Four to 6 week old female C3H/HeJ and C3H/SCID mice were purchased from  
20 the Jackson Laboratory. Animals were housed and handled under the guide for the care  
21 and use of laboratory animals of the National Institutes of Health. The animal  
22 experimental protocol was approved by the Yale University Institutional Animal Care  
23 and Use Committee. All experiments were performed in a Biosafety Level 2 animal  
24 facility, according to the regulations of Yale University. *I. scapularis* nymphs were  
25 obtained from a tick colony maintained in the laboratory in an incubator at 23° C with 85%  
26 relative humidity and a 14/10 h light/dark photo period regimen.

27

28 **Ethics Statement**

29

30 All studies with mice were carried out following the animal protocol number  
31 2014-07941 approved by Yale University's Institutional Animal Care and Use  
32 Committee (IACUC). The IACUC is governed by applicable Federal and State  
33 regulations, including those of the Animal Welfare Act (AWA), Public Health Service  
34 (PHS), NIH Office of Laboratory Animal Welfare Assurance Number A3230-01, and the  
35 United States Department of Agriculture (USDA), License and Registration Number 16-  
36 R-0001, and is guided by the U.S. Government Principles for the Utilization and Care of  
37 Vertebrate Animals Used in Testing, Research and Training.

38

39 ***Anaplasma phagocytophilum* infection of mice**

40

41 The *A. phagocytophilum* isolate NCH-1 (1) used in these studies was maintained  
42 through serial passage of infected blood in C3H/SCID mice (2). Quantitative PCR was  
43 performed on an aliquot of the blood collected from the SCID mice to quantify and  
44 standardize the infectious dose of *A. phagocytophilum*. In separate experiments, *A.*

45 *phagocytophilum* was similarly used to infect four to six week old female B6 mice  
46 deficient for IFN- $\gamma$  or IFN- $\gamma$  receptor (3) purchased from Jackson Laboratories.

47

#### 48 **Sample preparation and Illumina pyrosequencing of DNA from nymphal guts**

49

50 Prior to dissection, ticks were surface sterilized with 70% ethanol, followed by a  
51 rinse with sterile water. Midguts were dissected with sterile blades, and transferred to 350  
52  $\mu$ l of RLT plus lysis buffer (Qiagen, Valencia, CA). DNA was extracted from guts of  
53 individual fed nymphs (12-16 nymphs) using a genomic DNA extraction kit according to  
54 the manufacturer's instructions (Qiagen, Valencia, CA). The V4 variable region (V4) of  
55 the bacterial 16S rRNA was amplified from 1  $\mu$ l of purified genomic DNA from each  
56 sample using 12-base barcoded primer sets that were previously described (4). Briefly,  
57 16S rRNA genes were amplified from individual nymphal gut DNA samples, using the  
58 universal forward and reverse primers listed in SI Appendix, Table S6, and tagged with a  
59 unique 12-base barcode to mark PCR products from individual samples. PCR reactions  
60 were conducted using a Five Prime Hot Master Mix (MoBio Laboratories, Carlsbad, CA).  
61 PCR amplifications were performed in triplicate for each sample (4). Amplified bacterial  
62 16S rRNA products were purified using the QIAquick Gel Extraction Kit (Qiagen,  
63 Valencia, CA), quantified using the Nanodrop 2000C (Thermoscientific, Wilmington,  
64 DE), pooled together in equal molar concentrations, ethanol precipitated and suspended  
65 in 80  $\mu$ l of sterile RNase and DNase free water to a concentration of 8-10 ng / $\mu$ l of each  
66 sample. The pooled DNA was submitted to KECK facility at Yale University. Amplicon  
67 libraries were sequenced by Illumina MiSeq platform and 250 base pair paired end  
68 sequence reads were obtained.

69

#### 70 **16S rDNA sequence analysis and selection criteria**

71

72 Illumina paired-end reads were assembled by PANDAseq (5). The quality of  
73 sequences were analyzed by FastQC  
74 (<http://www.bioinformatics.babraham.ac.uk/projects/fastqc/>). Sequence with low quality  
75 scores (average quality score <0.25) was filtered out by PRINSEQ (6). Data were

76 analyzed using Quantitative Insights Into Microbial Ecology (QIIME) pipeline (v1.9.1)  
77 (7). Chimeric sequences were identified and removed using ChimeraSlayer. Open-  
78 reference picking strategies were performed, and sequences reads were clustered against  
79 the 2013 release of the Greengenes (8). Sequences with 97% similarity were clustered  
80 together and identified as different operational taxonomic units (OTUs), with one  
81 sequence per OTU being selected as a representative sequence for further downstream  
82 analysis. Each representative OTU sequence was aligned against a core set of reference  
83 sequences and taxonomy was assigned. OTUs which only occurring in 100% individual  
84 samples were included, in order to eliminate random occurred OTUs. Sequences that did  
85 not align to reference genes with 70% similarity threshold were assumed to be non-16S  
86 and removed from further analysis. Jackknifed beta diversity estimates (between-sample  
87 diversity comparisons) were calculated within QIIME using weighted and unweighted  
88 UniFrac (9). From these estimates, principal coordinates were computed to compress  
89 dimensionality into two-dimensional principal coordinate analysis (PCoA) plots.  
90 ADONIS was tested for statistical significance.

91 To best determine the bona fide microbiome of the nymphal tick we also included the  
92 following exclusion criteria-

- 93 1. To eliminate the possibility of contamination, we included a mock extraction of DNA  
94 under identical conditions using water, buffers and kits utilized for the experimental  
95 samples followed by Illumina Miseq analysis of 16S rRNA reads. The negative control  
96 sample provided only a handful of reads (about 413 reads) compared with experimental  
97 samples (>30,000 reads) (SI Appendix, Table S1 and Table S2) and did not provide reads  
98 corresponding to genera represented in the tick samples.
- 99 2. Genera which accounted for less than 1% of the total number of reads for both  
100 experimental groups was excluded i.e. If genera 'X' in both Ap and Clean represented  
101 <1% of OTUs within both groups, X was excluded.
- 102 3. Genera that were previously classified as "unknown" which have yet to be  
103 taxonomically classified were excluded from the final representation of genera.
- 104 4. Genera that were not consistently represented across all experiment groups- Ap, Clean,  
105 P1, sP1, D-serine, D-alanine were also excluded.

106

107 **Antibiotic treatment of mice**

108

109 One hundred µg of gentamicin was intraperitoneally injected at a concentration of  
110 10 mg/ml (the equivalent of 1 mg/ 20 gm body weight of a mouse) 24 hours prior to  
111 placement of nymphs and subsequently once each day for the next 4 days until the  
112 nymphs had all fully engorged and detached. Control mice received PBS, following the  
113 same regimen.

114

115 **Sectioning and staining of nymphs**

116

117 Nymphs, fed for 72 hours, were fixed in Carnoy's fixative for 1 hour, then  
118 washed in histological grade alcohol followed by three washes in xylene, and then  
119 paraffin embedded. The samples were then sectioned at 4 µm, stained with PAS at the  
120 Yale Histology Core Facility as described previously (10) and visualized under a Zeiss  
121 Axio YLCW023212 microscope at 63x magnification with ZEN Lite (Carl Zeiss,  
122 Thornwood, NY). The thickness of the PAS-positive PM-like layer was assessed in 3  
123 different regions of each microscopic field, and the arithmetic average was calculated. At  
124 least 3 fields per section were evaluated, and 10 individual sections were examined in  
125 each group. To visualize co-localization of IAFGP to biofilms within the tick guts,  
126 nymphs, fed on *Anaplasma* infected C3H/HeJ mice for 72 hours, fixed in Carnoy's  
127 fixative for 1 hour, washed in histological grade alcohol followed by three washes in  
128 xylene, and then paraffin embedded. The samples were then sectioned at 3 µm. Section  
129 pretreatment and immunostaining was performed as described (11). To detect IAFGP,  
130 mouse α-IAFGP polyclonal antibody was used (12), and rabbit α -PNAG polyclonal  
131 antibody was used to detect biofilm (13, 14). After incubation with primary antibodies,  
132 slides were washed and incubated with Alexa-488 labeled α -mouse or Alexa-555 labeled  
133 α -rabbit secondary antibodies (Invitrogen, Carlsbad, CA) for 1 hour. All incubation steps  
134 were completed in a humidified chamber. Cover slips were mounted along with a  
135 ProLong™ Gold antifade reagent (ThermoFisher Scientific, Waltham, MA). The slides  
136 were viewed under confocal microscopy using the Leica LSM510 confocal microscope at  
137 63x magnification (Leica Microsystems, Buffalo Grove, IL).

138

139 **Bacterial strains and growth conditions**

140

141 *Staphylococcus aureus* strain SA113 (ATCC 35556), derived from laboratory  
142 strain NCTC 8325, and its isogenic mutants were maintained in tryptic soy broth (TSB)  
143 or on its respective agar plates. *S. aureus*  $\Delta$ icaADBC isolate is a PNAG-deficient mutant  
144 (15). SA113  $\Delta$ tagO and SA113 pRBtagO is a wall teichoic acid (WTA) mutant and its  
145 isogenic WTA complemented strain respectively (16). *Enterococcus faecalis* strain  
146 MMH594 (NR-31975), vancomycin-resistant *Enterococcus faecalis* V587 (NR-31979)  
147 (BEI Resources, Manassas, VA) and *Enterococcus faecium* ATCC 49624 were  
148 maintained in brain heart infusion broth (BHI) or on its respective agar plates. Bacteria  
149 were cultured in their respective medium or supplemented with D-amino acids (D-serine  
150 or D-alanine) (Sigma, St. Louis, MO) to alter peptidoglycan composition.

151

152 **Immunoblot analysis**

153

154 PNAG detection was performed as described using rabbit antisera against PNAG  
155 (12). In brief, following incubation of *S. aureus* with proteins or peptides, PNAG was  
156 released into the supernatant by boiling in 0.5 M EDTA. Proteins were digested with  
157 Proteinase K treatment. Insoluble components were sedimented by centrifugation before  
158 loading the supernatant fraction on nitrocellulose membranes for detection by  
159 immunoblot. The guts from fed nymphs (*A. phagocytophilum*-infected versus uninfected,  
160 or sP1-injected versus P1-injected) were collected and PNAG was extracted as described  
161 above. Each sample was pooled from 2 guts and 20  $\mu$ L from each sample was spotted  
162 onto the membrane. The dot blots were analyzed and semi-quantified by ImageJ<sup>TM</sup>  
163 software (National Institutes of Health, Bethesda MD).

164

165 **Tick RNA isolation, quantitative RT-PCR and Microinjection**

166

167 RNA was extracted from individual guts by using an RNA isolation kit (Qiagen,  
168 Valencia, CA). cDNA was synthesized using the iScript RT-PCR kit (BioRad, Hercules,

169 CA). qRT-PCR for expression levels of *iafgp*, *peritrophin-1*, 2, 3, 4, and 5, total bacterial  
170 burden using universal bacterial *16S rRNA*, or bacterial specific *16S rRNA* or *23S rRNA*  
171 were done using SYBR Green Master Mix (BioRad, Hercules, CA) and primers listed in  
172 SI Appendix, Table S6. These data were normalized to tick *actin* (*tActin*) (17). For RNA  
173 interference, double stranded RNA targeting *iafgp* transcripts and dsRNA targeting  
174 *peritrophin-1*, 2, 3, 4, 5, and control *dsgfp* RNA were generated using primers listed in SI  
175 Appendix, Table S6. Fed nymphal gut cDNA or pCAG-GFP plasmid (www.addgene.org)  
176 was used as the template, respectively. dsRNA was injected into the anal pore of nymphal  
177 ticks as described (18). In separate experiments, a synthesized peptide derived from  
178 IAFGP, named P1, which retains the anti-biofilm properties of IAFGP, was also injected  
179 into the anal pore of nymphal ticks. A scrambled P1 (sP1) served as control (12). To  
180 examine the role of D-serine *in vivo*, 300 mM D-serine was injected into the anal pore of  
181 nymphal ticks; D-alanine served as control. To examine the role of INF- $\gamma$  in *iafgp*  
182 expression, 10 nL of 100 nM mouse INF-  $\gamma$  (R&D Systems, Minneapolis, MN) was  
183 injected into anal pore of nymphal ticks and compared to PBS negative control.

184

#### 185 **Cloning, expression, and purification of IAFGP.**

186

187 Purified IAFGP-GST was prepared as previously described (12). Briefly, *iafgp*,  
188 without its signal sequence, was PCR amplified from pGEMT*iafgp* (19) and cloned into  
189 pGEX-6p-3 (GE Healthcare, Piscataway, NJ). Protein expression was induced with 1 mM  
190 IPTG and bacteria were lysed using a French pressure cell press at 20,000 pounds per  
191 square inch. Following centrifugation, IAFGP-GST was affinity purified using GST  
192 Sepharose (GE Healthcare, Piscataway, NJ), eluted and stored in aliquots at  $-80^{\circ}\text{C}$ .  
193 Precision protease treatment or dialysis resulted in IAFGP degradation. Therefore, the  
194 GST-tagged protein in elution buffer was used for experiments. Recombinant GST was  
195 purified from pGEX-6p-3 following the same protocol and used as a control.

196

#### 197 **Extraction of peptidoglycan and muramidase digestion**

198

199            Gram positive bacteria- Fifty-milliliter overnight cultures of bacteria- *S. aureus*  
200 strain SA113 grown in either tryptic soy broth (TSB) or medium supplemented with 125  
201 mM D-serine (D-serine), 0.1 mg/mL GST-tagged IAFGP recombinant protein (IAFGP)  
202 or GST alone (GST) or each *Enterococcus* sp. grown in brain heart infusion broth alone  
203 was harvested by centrifugation and resuspended in the PBS. The samples were slowly  
204 dropped into an equal volume of boiling 10% (wt/vol) SDS and vigorously stirred  $\geq 2$  h  
205 and left stirring overnight. The insoluble fractions were recovered by high speed  
206 centrifugation (150,000 x g, 15 min, 25 °C) and washed until the fractions were free from  
207 SDS. The insoluble fractions were purified for peptidoglycan according to the protocol  
208 described by Jonge et al. (20). Purified peptidoglycan was re-suspended in 50 mM NaPO<sub>4</sub>  
209 buffer, pH 4.9 and treated with 80 µg/mL muramidase (Cellostyl) for 16 h at 37°C.  
210 Muramidase digestion was stopped by incubation in a boiling water bath, and coagulated  
211 proteins were removed by centrifugation (21,000 x g, 10 min). The supernatants were  
212 adjusted to pH 9.0 with sodium borate and reduced with sodium borohydride for 20 min  
213 at room temperature. Finally, samples were adjusted to pH 3.5 with orthophosphoric acid  
214 and filtered prior chromatographic analysis.

215            Gram negative bacteria- Five hundred-milliliter overnight cultures of bacteria- *P.*  
216 *aeruginosa* strains PA01 or PA14, and *E. coli* strains CS109 and DV900 were grown in  
217 LB media harvested by centrifugation and resuspended in the PBS. Muropeptides were  
218 isolated following previously described methods (21-23). In brief, samples were boiled in  
219 SDS 10% (wt/vol) for  $\geq 2$  h and left stirring overnight, and sacculi were repeatedly  
220 washed with MilliQ water by ultracentrifugation (150,000 × g, 15 min, 25 °C) until the  
221 fractions were free from SDS. Samples were treated with Pronase E (100 µg/mL, 1 h, 60  
222 °C) for Braun's lipoprotein removal. The reaction was heat-inactivated, and sacculi were  
223 further washed by ultracentrifugation as described above. Purified peptidoglycan was re-  
224 suspended in 50 mM NaPO<sub>4</sub> buffer, pH 4.9 and digested with muramidase (80 µg/mL)  
225 for 16 h at 37 °C and heat-inactivated. Coagulated proteins were removed by 10 min of  
226 centrifugation at 21000 × g. The supernatants were adjusted to pH 9.0 with sodium borate  
227 and reduced with sodium borohydride for 20 min at room temperature. Finally, samples  
228 were adjusted to pH 3.5 with orthophosphoric acid.

229



230 **UPLC and MS/MS peptidoglycan analysis.**

231

232 The separation and identification of mucopeptides, from gram positive bacteria,  
233 was performed on an UHPLC system (Agilent 1290 Infinity LC System) hyphenated to  
234 an Agilent Q-TOF LC/MS (6550 iFunnel) system (Agilent Technologies, Santa Clara,  
235 CA). The chromatographic separation was achieved on RP-18 (Kinetex® 1.7 µm, 100 Å,  
236 150 x 2.1 mm id, Phenomenex) column. The eluents were A: 0.1% formic acid in Milli-Q  
237 water and B: 0.1% formic acid in acetonitrile. The gradient was set as follows: 0-3 min 2-  
238 5% B, 3-6 min 5-6.8% B, 6-7.5 min 6.8-9% B, 7.5-9 min 9-14% B, 9-10.5 min 14-18.8%  
239 B, 10.5-11 min 18.8-20% B, 11-12 min hold at 20% B, 12-13 min 20-40% B, 13-14 min  
240 40-98% B with a flow rate of 0.175 ml/min; 14-17 min hold at 98% B, 17-17.5 min 98-  
241 2% B with a flow rate of 0.3 ml/min; and 17.5-21 min hold at 2% B with a flow rate of  
242 0.175 ml/min. Chromatograms were recorded at 204 nm. The QTOF-MS instrument  
243 operated in positive ionization mode. For MS/MS experiments fixed collision energy of  
244 40 V was applied. The system was operated in full scan mode from 50 to 1700 m/z with a  
245 scan rate of 6 spectra/s for both MS and MS/MS experiments. Data acquisition of MS and  
246 MS/MS spectra was performed in Auto-MS/MS mode selecting 3 precursors per cycle.  
247 The source conditions were: gas temperature 150 °C, gas flow 16 l/min, nebulizer  
248 pressure 35 psi, sheath gas temperature 350 °C, sheath gas flow 11 l/min, capillary  
249 voltage 3500 V, nozzle voltage 300 V, fragmentor voltage 380 V, skimmer 45 V and  
250 octopole radio frequency voltage 750 V. Structural characterization of mucopeptides was  
251 done on the basis of their MS data and MS/MS fragmentation pattern which matched  
252 with the peptidoglycan composition and structure reported in previous publications (20,  
253 24-26). Data analysis was performed with the software MassHunter Qualitative Analysis  
254 B.07.00 (Agilent Technologies). Molar fractions of oligomers (dimers, trimers, tetramers)  
255 were determined from the area under the peaks in the chromatogram, and the crosslinking  
256 percentage was calculated according to the formula: % Crosslinking = % molar fraction  
257 dimers + 2 x (% molar fraction trimers) + 3 x (% molar fraction tetramers). The  
258 multipliers in the formula above are used to account for the number of crosslinks per  
259 oligomer; for instance, a trimer contains two crosslinks and therefore is multiplied by 2  
260 (27).

261

262 **Muropeptide binding assay.**

263

264 Magnetic, streptavidin-coated Dynabeads® (Life Technologies, Grand Island,  
265 NY) at 4 mg/mL were washed and separated using a Magnetic Particle Concentrator  
266 (DynaMag-Spin, Invitrogen, Carlsbad, CA). The solution was incubated with 1 mg/mL  
267 biotinylated recombinant IAFGP-GST or GST (12) protein or 1 mg/mL biotinylated  
268 synthetic muropeptides (ThermoFisher Scientific, Waltham, MA) at a 1:2 v/v ratio. Two  
269 synthetic muropeptides were chemically synthesized: [Biotin]-L-alanine-D-iso-  
270 glutamine-L-lysine-D-alanine-D-alanine and [Biotin]-L-alanine-D-iso-glutamine-L-  
271 lysine-D-alanine-D-serine with >86% purity. Subsequent to 30-minute incubation with  
272 gentle agitation, samples were separated into the unbound biotinylated protein or  
273 muropeptide supernatants and magnetically bound fraction. Samples were washed and  
274 resuspended in PBS. 100 µL of endogenous muropeptides isolated from either TSB or  
275 125 mM D-serine supplemented medium were added to the magnetically bound protein-  
276 bead solution at a 1:2 volume ratio. Similarly, 1 mg/mL of IAFGP-GST, GST or PBS  
277 were added to muropeptide bound beads. When assessing pentapeptide-P1 binding, 1  
278 mg/ml of 6x histidine-tagged P1 and 6x histidine-tagged scrambled-P1 (sP1) were added  
279 to the muropeptide-bead solution at a 1:2 volume ratio. After incubation at 4°C for 1 hour  
280 with gentle agitation, samples were separated with the magnet and the supernatants were  
281 collected. Beads were washed with PBS + 0.1% Bovine Serum Albumin solution and  
282 resuspended. Samples were heated at 65°C for 5 minutes to dissociate the streptavidin  
283 beads from the biotinylated muropeptide or protein. Supernatants were collected and  
284 blotted on a nitrocellulose membrane (Bio-Rad, Hercules, CA). IAFGP-GST was  
285 detected using a polyclonal murine primary antibody (12) and GST was detected using a  
286 monoclonal murine primary antibody (ThermoFisher Scientific, Waltham, MA).  
287 Histidine-tagged peptides were detected using a polyclonal murine primary antibody to  
288 the 6x-histidine tag (Clontech, Mountain View, CA). Biotinylated muropeptides or  
289 proteins were detected using an infrared (IR)-labeled streptavidin probe (LI-COR,  
290 Lincoln, NE). Endogenous muropeptides were detected using a polyclonal goat Wheat  
291 Germ Agglutinin antibody (Vector Laboratories, Burlingame, CA). Appropriate LICOR

292 secondary antibodies were used that would be detected using the LI-COR Odyssey  
293 system (LI-COR, Lincoln, NE). Dynabeads® His-Tag isolation beads (Life  
294 Technologies, Grand Island, NY) were used, according to manufacture recommended  
295 protocols, to assess interactions between chemically synthesized 6x-His tagged IAFGP or  
296 P1 peptide variants (ThermoFisher Scientific, Waltham, MA) (with >86% purity) (SI  
297 Appendix, Table S5) and muropeptides extracted from *S. aureus* or *E. faecalis* bacterial  
298 cells cultured in TSB.

299

### 300 **Static biofilm assay.**

301

302 Biofilm assays were performed as previously described by Christensen et al. (28).  
303 Briefly, planktonic cultures of *S. aureus* SA1113, *E. faecalis* MMH594, *Pseudomonas*  
304 *aeruginosa* strains PA01 or PA14, and *Escherichia coli* CS109 were diluted in glucose-  
305 supplemented tryptic soy broth (1% glucose; TSB/G), brain heart infusion broth (1%  
306 glucose; BHI/G) alone or Luria-Bertani broth (1% glucose; LBG) respectively or media  
307 supplemented with the appropriate treatment condition to an OD<sub>600</sub>= 0.015 and  
308 distributed into 96 well plates (Corning, NY). Plates were incubated for 18 h at 37°C and  
309 bacterial growth in each well was confirmed by the measurement of OD<sub>600</sub> using a  
310 spectrophotometer (BioTek, Winooski, VT). The supernatant was discarded and the wells  
311 were washed with water twice. Bacteria associated with the well surface were dried and  
312 stained with red-colored safranin dye (for *S. aureus*) or crystal violet dye (for *E. faecalis*,  
313 *P. aeruginosa* or *E. coli*). The dye was then dissolved in 33% acetic acid and the  
314 absorbance quantified at 415 nm (for *S. aureus*) or 550 nm (for *E. faecalis*, *P. aeruginosa*  
315 or *E. coli*) using a spectrophotometer (BioTek, Winooski, VT).

316

### 317 **Artificial feeding of nymphs.**

318

319 Capillary feeding was performed as described earlier (29) with a solution of  
320 fluorescein-conjugated 500,000 MW dextran (Molecular Probes, ThermoFisher  
321 Scientific, Waltham, MA) (2 µM in PBS/0.2 % sucrose) for 1 h. Whole ticks were then  
322 dissected, and guts placed in a drop of ProLong™ Gold antifade reagent (ThermoFisher

323 Scientific, Waltham, MA), cover-slipped and visualized immediately under a Leica  
324 LSM510 confocal microscope.

325

### 326 **Scanning electron microscopy**

327

328 Tick guts were dissected to reveal luminal surface out and were fixed in 2.5%  
329 glutaraldehyde and 2% paraformaldehyde in 0.1M sodium cacodylate buffer for 1 hour.  
330 The samples were rinsed well in 0.1M sodium cacodylate and were postfixed in 2%  
331 osmium tetroxide for 1 hour, then rinsed, dehydrated in an ethanol series 30% to 100%  
332 and were critical point dried using Leica 300 with liquid carbon dioxide as transitional  
333 fluid. The samples were glued to aluminum stubs, and sputter coated with 15nm gold  
334 using an EMS (Electron Microscopy Science, Hatfield, PA) sputter coater. The samples  
335 were viewed and digital images acquired in an FEI ESEM (FEI, Hillsboro OR) using 5 -  
336 10kV at a working distance of 12mm.

337

### 338 **Transmission electron microscopy.**

339

340 Bacteria were fixed in 2.5% glutaraldehyde in 0.1M sodium cacodylate buffer  
341 pH7.4 for 1 hour. Buffer rinsed cells were spun down in 2% agar in 0.1M sodium  
342 cacodylate. Chilled blocks were trimmed and post fixed in 1% osmium tetroxide for 1  
343 hour, en bloc stained in aqueous 2% uranyl acetate for another hour, and then rinsed in  
344 buffer and dehydrated in an ethanol series from 50% to 100%. The samples were  
345 infiltrated with Embed 812 (Electron Microscopy Sciences, Hatfield, PA) epoxy resin  
346 and baked overnight at 60°C. Hardened blocks were cut using a Leica UltraCut UC7.  
347 60nm sections were collected on formvar/carbon coated grids and contrast stained using  
348 2% uranyl acetate and lead citrate. Grids were viewed using a FEI Tencai Biotwin TEM  
349 at 80Kv. Images were taken using Morada CCD and iTEM software (Olympus, Center  
350 Valley, PA).

351

352 Following imaging, area measurements of the peptidoglycan layer were  
353 conducted on the GNU Image Manipulation Program (GIMP). The program was used to

354 demarcate two circles- one around each bacterial cell including the peptidoglycan layer  
355 and the other around the cell membrane (without the peptidoglycan). The difference in  
356 the total number of pixels from the two circles yielded the number of pixels within the  
357 peptidoglycan layer. This area, of the peptidoglycan layer, was converted into a  
358 percentage. Identical measurements were made across all experimental groups. Analyzed  
359 images were of equal magnification.

360

### 361 **Fluorescence microscopy experiments.**

362

363 Overnight cultures of *S. aureus* SA113 bacteria were subcultured for 2 hours in  
364 fresh TSB or medium supplemented with GST alone, IAFGP-GST (each at 0.1 mg/mL),  
365 125 mM D-alanine or D-serine or an equivalent volume of PBS control. Cells were  
366 harvested and washed with PBS to prevent further treatment. Each sample was  
367 resuspended in PBS supplemented with 1 mM CaCl<sub>2</sub> and incubated with 2 µg/mL of  
368 Wheat-Germ Agglutinin conjugated to TexasRed (ThermoScientific, Waltham, MA) or 5  
369 µg/mL of the lipophilic membrane binding probe- FM® 4-64 (ThermoScientific,  
370 Waltham, MA) at room temperature for 10 minutes. Excess stain was removed by  
371 washing twice with, and resuspended in PBS. Cell suspensions were spotted on 2%  
372 agarose pads containing PBS and phase/epifluorescent microscopy images were acquired  
373 using an Eclipse Ti-U microscope (Nikon, Japan) outfitted with an Orca-ER camera  
374 (Hamamatsu, Japan). Image processing and quantitative analysis were performed using  
375 MATLAB (MathWorks, Natick, MA). Each cell included in the analysis were detected  
376 using a modified version of MATLAB scripts described elsewhere (30). Total signal  
377 intensity was normalized by the total area of the cell and graphed as histograms using  
378 MATLAB.

379

### 380 **Statistical analysis**

381

382 All experiments were repeated independently at least 3 times, if not noted  
383 otherwise. One representative experiment or pooled data are shown. Statistical  
384 differences between experimental and control groups were analyzed using GraphPad

385 Prism version 6.0 software (GraphPad Software, La Jolla, CA). Significance was  
386 determined using two-tailed nonparametric Mann-Whitney test, Students T-Test, or One-  
387 Way ANOVA with Dunnett's multiple comparison post-test. A  $p$  value  $< 0.05$  was  
388 considered significant.  
389

390 **Supporting Information- Figure Legends**

391

392 **Figure S1.**

393 **(A, B). *Anaplasma phagocytophilum* changes the tick microbiota.**

394 Comparison of the gut microbiota composition, at the taxonomic rank of order, of  
395 uninfected and *A. phagocytophilum*-infected fed nymphs. (A) Total bacterial composition  
396 (in percent) and (B) fold change ratio of *A. phagocytophilum*-infected (Ap) to uninfected  
397 (Clean) fed nymphs.

398 **(C, D, E). Gentamicin treatment alters the tick microbiome.**

399 qRT-PCR assessment of (A) total bacterial burden, (B) *Pseudomonas* sp., and (C)  
400 *Enterococcus* sp. of nymphal tick midguts (MG) upon feeding with gentamicin (Gen)  
401 treated mice. PBS treated clean mice were used as a negative control. Horizontal bars  
402 represent the median. Each dot represents one nymph. Results were pooled from two  
403 independent experiments and statistical significance was calculated using a two-tailed  
404 nonparametric Mann-Whitney test (\*\* p=0.052, \*\*\* p<0.0002)

405

406 **Figure S2.**

407 **(A). PNAG antibody detects native biofilms within tick guts**

408 Clean tick guts extracted for biofilm-associated PNAG polysaccharide was spotted  
409 directly onto nitrocellulose membranes and probed with a goat  $\alpha$ -PNAG antibody. Spots  
410 were compared to PNAG produced by *Staphylococcus aureus* strain SA113 wildtype and  
411 its isogenic PNAG deficient mutant (SA113  $\Delta$ ica).

412 **(B). IAFGP co-localizes with biofilms within the tick gut.**

413 *A. phagocytophilum*-infected ticks were paraffin embedded and sectioned for  
414 immunofluorescence staining using the  $\alpha$ -PNAG antibody to detect biofilms and the  $\alpha$ -  
415 IAFGP-GST antibody to detect IAFGP. In contrast, we used the  $\alpha$ -GST antibody as a  
416 control. Brightfield images shows gut epithelium cells surrounding the lumen "L". Co-  
417 localization was observed between IAFGP and the biofilms in merged compared to the  $\alpha$ -  
418 GST antibody control antibody (arrows). Scale bar = 10 $\mu$ m.

419 **(C, D, E). *Anaplasma phagocytophilum* infection diminishes *Enterococci* burden**  
420 **within the tick gut.**

421 Comparison of the levels of *Enterococci* within the tick gut microbiota between  
422 uninfected (Clean) and *A. phagocytophilum*-infected (Ap) fed nymphs. Relative  
423 abundance of *Enterococci* among (B) individual samples and (C) across all samples  
424 (pooled). (D) *A. phagocytophilum*-infected fed nymphs reduces levels of *Enterococci*  
425 compared to uninfected nymphal ticks as determined by qRT-PCR using *Enterococcus*  
426 specific primers. Statistical significance was calculated using a two-tailed nonparametric  
427 Mann-Whitney test (\*  $p < 0.05$ , \*\*\*\*  $p < 0.0001$ ).

428

429 **Figure S3.**

430 **(A, B). Variable binding of peptide P1 to *Enterococci* bacteria and their**  
431 **peptidoglycan.**

432 *Enterococcus faecalis* (E.fs), vancomycin-resistant *Enterococcus faecalis* (VRE), and  
433 *Enterococcus faecium* (E.fm) (A) whole bacterial cells were incubated with His-tagged  
434 sP1 or P1 peptide and assessed for binding. Bound (Associated) or unbound  
435 (Supernatant) peptide was detected by immunoblot analysis using a monoclonal His-  
436 tagged antibody. Cell wall bound fraction (Associated) versus unbound (Supernatant)  
437 bacterial fractions were distinguished by using a polyclonal anti-Wheat Germ Agglutinin  
438 ( $\alpha$ -WGA) that detects bacterial peptidoglycan. (B) Streptavidin-coated magnetic  
439 Dynabeads bound to biotinylated P1 (b-P1) or sP1 (b-sP1) were incubated with purified  
440 muropeptide extracts obtained from the bacterial cells grown in brain heart infusion  
441 broth. Biotinylated peptides bound to beads were detected using an infrared (IR)-labeled  
442 streptavidin probe. Muropeptides from cells were detected using a polyclonal Wheat  
443 Germ Agglutinin antibody ( $\alpha$ -WGA). Unbound peptide was also collected and spotted.  
444 Associated or Supernatant fractions represent the fractions that were either pulled down  
445 with the magnetic bead or remained unbound. Strongest binding to whole cells or purified  
446 peptidoglycan was demonstrated between P1 and *E. faecalis*.

447 **(C). P1 binds *Staphylococcus aureus* peptidoglycan.**

448 Insoluble *S. aureus* peptidoglycan was diluted to 0.5 mg/mL in PBS/ 0.5% Tween/ 5%  
449 fetal bovine serum solution and washed for 40 minutes at 4°C with gentle agitation. 1  
450 mg/mL biotinylated peptide- P1 (b-P1) or scrambled peptide- sP1 (b-sP1) was added to  
451 the peptidoglycan samples at 1:1 v/v ratio and incubated for 60 minutes at 4°C with



452 gentle agitation. Samples were washed in PBS and immunoblot assays were performed  
453 on a nitrocellulose membrane spotted with the respective samples. Bacterial  
454 peptidoglycan was detected using a polyclonal anti-Wheat Germ Agglutinin antibody ( $\alpha$ -  
455 WGA) and biotinylated peptides were detected using an infrared-labeled streptavidin  
456 probe.

457 **(D). P1 binds to the terminal D-alanine residue of the native *Staphylococcus aureus***  
458 **muropeptide chain.**

459 1 mg/ml synthetic biotinylated muropeptides containing either D-alanine or D-serine  
460 were immobilized to streptavidin-coated magnetic dynabeads. Muropeptide-peptide  
461 binding was determined by incubating 1 mg/ml of 6x histidine-tagged peptide P1 or 6x  
462 histidine-tagged scrambled-P1 (sP1) to the muropeptide-bead solution at a 1:2 volume  
463 ratio. Bead-muropeptide-peptide complexes were washed in a PBS/0.1% Bovine Serum  
464 Albumin (BSA), dissociated from one another and spotted directly on a nitrocellulose  
465 membrane. Histidine-tagged peptides were detected using a polyclonal murine primary  
466 antibody to the 6x-histidine tag. Biotinylated muropeptides were detected using an  
467 infrared (IR)-labeled streptavidin probe. Unbound muropeptide (UB) collected prior to  
468 incubation with His-tagged peptides was also spotted. PBS was used as a peptide binding  
469 buffer control. Associated or Supernatant fractions represent the fractions that were either  
470 pulled down with the magnetic bead or remained unbound.

471 **(E, F). IAFGP and P1 do not bind *Enterococci* grown in D-serine**

472 **(E)** Recombinant GST-tagged IAFGP or GST alone and **(F)** His-tagged sP1 or P1 peptide  
473 were tested for binding to *E. faecalis* (E.fs) or *E. faecium* (E.fm) whole bacteria grown  
474 with 125mM D-serine supplemented to the culture medium. **(E)** Lane 1. Positive control-  
475 1 mg/mL IAFGP or GST alone; Lanes 2, 3- Protein bound to *E. faecalis* (E.fs) or *E.*  
476 *faecium* (E.fm) bacterial surface (Associated); Lanes 4, 5- Protein found in the unbound  
477 fraction (Supernatant) for *E. faecalis* (E.fs) or *E. faecium* (E.fm). **(F)** Peptide was  
478 detected using a monoclonal His-tagged antibody ( $\alpha$ -His). Cell wall bound fraction  
479 (Associated) versus unbound (Supernatant) bacterial fractions were distinguished by  
480 using a polyclonal anti-Wheat Germ Agglutinin antibody ( $\alpha$ -WGA).

481 **(G). Bacterial wall teichoic acids are not involved in mediating P1 binding to**  
482 **bacterial cells.**

483 Approximately  $1.5 \times 10^7$  *S. aureus* SA113 wildtype (WT) bacteria, isogenic wall teichoic  
484 acid (WTA) deletion mutant ( $\Delta tagO$ ), and its complemented strain (+TagO) were  
485 incubated with His-tagged sP1 or P1 peptide and assessed for binding. Bound  
486 (Associated) or unbound (Supernatant) peptide was detected by immunoblot analysis  
487 using a monoclonal His-tagged antibody. Cell wall bound fraction (Associated) versus  
488 unbound (Supernatant) bacterial fractions were distinguished by using a polyclonal anti-  
489 Wheat Germ Agglutinin antibody ( $\alpha$ -WGA) that detects bacterial peptidoglycan. P1  
490 binds WT bacteria and its isogenic WTA deletion and complementation mutants without  
491 any distinct variability.

492 **(H). IAFGP displays very weak binding to lipoteichoic acid.**

493 Streptavidin-coated magnetic Dynabeads bound to biotinylated IAFGP-GST (b-IAFGP)  
494 or GST alone (b-GST) were incubated with purified lipoteichoic acid (LTA). Biotinylated  
495 proteins were detected using an infrared (IR)-labeled streptavidin probe. IAFGP-GST  
496 was detected using a polyclonal murine primary antibody ( $\alpha$ -IAFGP-GST) and GST was  
497 detected using a monoclonal murine primary antibody ( $\alpha$ -GST). LTA was detected using  
498 a monoclonal murine antibody directed against LTA ( $\alpha$ -LTA) from gram positive  
499 bacteria. Unbound IAFGP or GST protein (UB) and unbound LTA (UB-LTA) was also  
500 collected and spotted. Associated represent the fractions that was pulled down with the  
501 magnetic bead and remained bound to the biotinylated protein. IAFGP displays only a  
502 modicum increase in binding to LTA compared to GST alone control protein.

503

504 **Figure S4.**

505 **Muropeptide composition and profile of *Staphylococcus aureus* SA113 obtained by**  
506 **UPLC-QTOF-MS/MS.**

507 (A, B, C). Muropeptide profile of *S. aureus* SA113 cultured in either TSB or medium  
508 supplemented with 125 mM D-serine. (A) Total Ion Current (TIC) chromatogram  
509 obtained by reversed phase UPLC-QTOF-coupled to MS/MS is shown. Peaks are  
510 represented as numbers throughout the chromatogram. (B) Histogram profile representing  
511 peak intensity of individual peaks obtained from (A). Results were pooled from 3  
512 independent experiments  $\pm$  SEM. (C) Proposed structures of the indicated peaks that  
513 were successfully identified.

514 **(D)**. Total Ion Current (TIC) chromatogram of muropeptides extracted from *S. aureus*  
515 SA113 cultured in either TSB or medium supplemented with 0.1 mg/mL GST alone or  
516 GST-IAFGP (IAFGP) protein.

517 **(E)**. Crosslinking percentage between the glycan strands from cells grown in the  
518 respective media. Results were pooled from 3 independent experiments  $\pm$  SEM.  
519 Statistical significance was calculated using one-way ANOVA with Dunnett's multiple  
520 comparison posttest (\*\*p<0.001, \*\*\*\*p<0.0001).

521

## 522 **Figure S5.**

### 523 **IAFGP and P1 does not bind gram negative peptidoglycan or inhibit their biofilms.**

524 **(A)** Biotinylated IAFGP (b-IAFGP) or control protein biotinylated GST (b-GST) or **(B)**  
525 biotinylated P1 peptide (b-P1) or biotinylated control scramble peptide sP1 (b-sP1) were  
526 immobilized onto Streptavidin coated magnetic dynabeads and incubated with purified  
527 muropeptide extracts obtained from gram negative bacteria. Gram negative bacteria  
528 tested included 2 different *Pseudomonas aeruginosa* strains (PA01 and PA14) and 2  
529 *Escherichia coli* strains- parental strain CS109 (Ec) and its isogenic DD-  
530 carboxypeptidase enzyme mutant strain DV900 (Ec $\Delta$ ) which accumulates pentapeptides-  
531 due accumulative mutations in DD-carboxypeptidase activities:  $\Delta$ ponB,  $\Delta$ dacA,  $\Delta$ dacB,  
532  $\Delta$ dacC,  $\Delta$ dacD,  $\Delta$ pbpG,  $\Delta$ ampH,  $\Delta$ ampC, and  $\Delta$ pbp4b. Biotinylated protein **(A)** or  
533 peptide **(B)** was detected using an infrared (IR)-labeled streptavidin probe. Muropeptides  
534 from bacteria was detected using a polyclonal Wheat Germ Agglutinin antibody ( $\alpha$ -  
535 WGA). Unbound protein or peptide (UB) was also collected and spotted. Associated or  
536 Supernatant fractions represent the fraction that were either pulled down with the  
537 magnetic bead or remained unbound. Strongest binding interaction was observed with  
538 either b-IAFGP **(A)** or b-P1 **(B)** and the *E. coli* mutant DV900. Only trace amounts of  
539 binding were detected with the other bacterial strains. Neither control protein or peptide  
540 (b-GST or b-sP1) was found to interact with any of the muropeptide extracts.

541 **(C, D, E)** Wildtype *P. aeruginosa* strains PA01 **(C)**, PA14 **(D)** and *E. coli* parental strain  
542 CS109 **(E)** were tested for growth and biofilm formation in their LBG (LB supplemented  
543 with 1% glucose) medium or medium supplemented with 0.1 mg/mL GST alone (GST),  
544 recombinant GST-tagged IAGFP (IAFGP), P1 or sP1 control scramble peptide. Biofilm

545 associated growth was assessed after static incubation at 37°C for 24 h and measured at  
546 OD<sub>600</sub> (top graph). Biofilm associated bacteria were stained with crystal violet, imaged,  
547 and dissolved for quantification by measuring absorbance at 550nm (bottom graph).  
548 Results were pooled from 3 independent experiments, each with four technical replicate,  
549 ± SEM. *P. aeruginosa* strains biofilms are formed the air-liquid interface. No significant  
550 difference was noted in biofilms across all three bacteria when treated with either IAFGP  
551 or GST.

552

553 **Figure S6.**

554 **Biofilm reduction with 125 mM D-serine does not influence *Staphylococcus aureus***  
555 **or *Enterococcus faecalis* growth or viability.**

556 Overnight cultures of *S. aureus* SA1113 (**A, C, E**) or *E. faecalis* MMH594 (**B, D**) were  
557 diluted in TSBG or BHIG respectively (medium) or medium supplemented with 125 mM  
558 D-alanine, 125 mM D-serine or an equivalent volume of PBS control and inoculated into  
559 a 96-well microtiter plate.

560 (**A, B**). Biofilm associated growth was assessed after static incubation at 37°C for 24 h.  
561 Bacterial density was measured at OD<sub>600</sub> using a microtiter ELISA plate reader. Data was  
562 compiled from three independent experiments, each experiment comprising four  
563 technical replicates, and pooled ± SEM.

564 (**C, D**). Bacterial viability was quantified after sonication of each well and plating serial  
565 dilutions. Average CFU values pooled from three independent experiments ± SEM is  
566 shown.

567 (**E**). Planktonic growth was measured at 30-minute intervals for 24 hours at 600nm using  
568 a spectrophotometer. Growth curves from three independent experiments, each with four  
569 technical replicates, were pooled ± SEM. Bacteria free media is represented as the  
570 negative control.

571

572 **Figure S7.**

573 **(A – D). D-serine changes the tick microbiota.**

574 Gut microbiota composition, at the taxonomic rank of genus, for D-alanine or D-serine  
575 injected nymphs. (**A**) Total bacterial abundance (in percent) and (**B**) fold change ratio of

576 D-serine treated nymphs relative to D-alanine injection of fed nymphs. Green and red box  
577 outlines represent genera with increased or decreased abundance upon D-serine  
578 treatment. (C, D) Comparison between the levels of *Enterococci* within the tick gut  
579 microbiota between D-alanine and D-serine injection of ticks. Relative abundance of  
580 *Enterococci* among (C) individual samples and (D) across all samples (pooled).  
581 **(E). P1 inhibits biofilm formation of different gram-positive bacteria.**  
582 Cultures of *Staphylococcus aureus* SA113 (S. a.), *Staphylococcus epidermidis* (S. e.),  
583 *Staphylococcus saprophyticus* (S. s.), *Streptococcus mutans* (S. m.), *Corynebacterium*  
584 *pseudodiphtheriticum* (C. p.), and *Enterococcus faecalis* (E. f.) were grown in TSB-  
585 glucose or BHI-sucrose medium supplemented with 0.1 mg/mL P1 or sP1 control peptide  
586 in microtiter plates. Plates were incubated for 18 h at 37 °C stationarily, washed for non-  
587 adherent bacteria and stained for biofilms with crystal violet. Results were pooled from 3  
588 independent experiments  $\pm$  SEM and are shown as the total biofilm biomass normalized  
589 to sP1 control peptide. Statistical significance between each peptide for a given bacterial  
590 species was calculated using unpaired Student t-test with Welch's correction (\*\*\*)  
591  $p < 0.0001$ , \*\*\*  $p < 0.0008$ ).

592

### 593 **Figure S8.**

#### 594 **(A – C). Expression pattern of IAFGP.**

595 (A). qRT-PCR examination of the *iafgp* expression level between uninfected (Clean) fed  
596 ticks versus ticks fed after treatment with P1 peptide, D-serine or gentamicin. Each dot  
597 represents one nymph.

598 (B). Uninfected nymphal ticks (n=10) were fed on *A. phagocytophilum* infected IFN- $\gamma$   
599 knockout mice. qRT-PCR was performed to determine the expression of *iafgp* from tick  
600 midguts (MG) 72 hours post feeding. Uninfected (Clean) IFN- $\gamma$  knockout mice were  
601 used as a control.

602 (C). qRT-PCR assessment of *iafgp* expression from nymphal ticks upon injection of 100  
603 ng/mL recombinant mouse IFN- $\gamma$  protein of nymphal ticks. PBS injection was used as a  
604 control. For both experiments, each dot represented one nymph and results are pooled  
605 from one experiment; statistical significance was calculated using a two-tailed  
606 nonparametric Mann-Whitney test (\*\*\*)  $p = 0.0008$ ).

607

608 **Figure S9.**

609 **(A, B). Impact of IAFGP binding on bacterial peptidoglycan.**

610 (A). The area of the peptidoglycan layer was calculated for *S. aureus* SA113 grown  
611 planktonically in either TSB (n = 53 cells) or medium supplemented with 125 mM D-  
612 alanine (n = 55 cells), 125 mM D-serine (n = 61 cells), 0.1 mg/mL GST-IAFGP (n = 49  
613 cells) or 0.1mg/mL GST alone (n = 53 cells). Cultures were also grown in an equivalent  
614 volume of PBS as a buffer control (n = 24 cells). The data is represented as a percentage  
615 normalized to the TSB control. Results were pooled from images taken with the  
616 transmission electron microscope  $\pm$  SEM. Statistical significance was calculated using  
617 one-way ANOVA with Dunnett's multiple comparison posttest (\*\*\*\* p<0.0001, \*\*  
618 p<0.001).

619 (B). Bacterial cells cultured in TSB or medium supplemented with PBS, D-alanine, D-  
620 serine, GST, or IAFGP were stained with the membrane-binding probe FM® 4-64 (J)  
621 and imaged by Phase-contrast (left-phase) and epifluorescent microscopy (middle).  
622 Population analysis (graph), at the single cell level, demonstrate that IAFGP and D-serine  
623 treatments result in an increase in fluorescent signal intensity. Total fluorescent signal  
624 intensities were normalized by cell area and histograms depicted as a function of  
625 population frequency. n > 500 cells for each treatment was pooled from 2 independent  
626 experiments. Scale bar = 2  $\mu$ m.

627

628 **Figure S10.**

629 **(A, B). Binding by IAFGP can only be outcompeted with high concentrations of free**  
630 **D-alanine.**

631 (A) Synthetic biotinylated pentapeptide containing D-alanine immobilized to  
632 streptavidin-coated magnetic dynabeads were incubated with recombinant GST-IAFGP  
633 (IAFGP). IAFGP was eluted with varying concentrations of free D-amino acids (D-  
634 alanine [D-ala] or D-serine [D-ser]). The Bound or Eluted protein was spotted directly  
635 onto a nitrocellulose membrane for immunoblot analysis. Unbound or Bound biotinylated  
636 pentapeptide (bMA) was detected using an infrared (IR)-labeled streptavidin probe.  
637 IAFGP protein that was eluted or remained bound was detected using a polyclonal

638 murine primary antibody. D-serine was used as a negative control. **(B)** The relative  
639 intensity of the eluted or bound IAFGP treated with varying concentrations of free D-  
640 alanine was quantified. Results were pooled from 3 independent experiments  $\pm$  SEM and  
641 analyzed using a 2-way ANOVA with Sidak's multiple comparison posttest (\* $p$ <0.1,  
642 \*\* $p$ <0.01, \*\*\* $p$ <0.001, \*\*\*\* $p$ <0.0001).

643 **(C, D). Excess free D-alanine prevents IAFGP and P1 from inhibiting biofilms.**

644 **(C)** *S. aureus* SA113 and **(D)** *E. faecalis* MMH594 were grown for biofilms in either  
645 TSBG or BHIG respectively, or medium supplemented with 0.1 mg/mL GST alone,  
646 GST-IAGFP or GST-IAGFP treated with 125 mM (high) or 10 mM (low) D-alanine.  
647 Experiments were similarly conducted with 0.1 mg/mL sP1 and P1 peptide. *S. aureus*  
648 biofilms were stained with safranin (red color) and *E. faecalis* biofilms were stained with  
649 Crystal violet (purple); a representative biofilm stain is shown for each. Dissolved stains  
650 were pooled from 3 independent experiments  $\pm$  SEM. Statistical significance was  
651 calculated using 2-way ANOVA with Sidak's multiple comparison posttest  
652 (\*\*\*\* $p$ <0.0001).

653

654 **Figure S11.**

655 **(A, B). Growth and biofilm formation for IAFGP and P1 peptide variants.**

656  $1.5 \times 10^6$  cfu/mL **(A)** *S. aureus* (strain SA113) or **(B)** *E. faecalis* (strain MMH594) were  
657 incubated with 5 different IAFGP peptide variants (i0, i1, i2, i3, and i4) (blue borders) or  
658 four P1 peptide variants (P1a, P1b, P1c, and P1d) (green borders) (SI Appendix, Table  
659 S5) in 96-well microtiter plates stationarily for 24 hours. All peptides were used at 0.1  
660 mg/mL (40  $\mu$ M). Peptide variants were generated based off their original sequence (12).  
661 Growth (top graph) was assessed by measuring absorbance at 600nm. The wells were  
662 washed for non-adherent bacteria and resident biofilm associated cells were stained with  
663 safranin (*S. aureus*) or crystal violet (*E. faecalis*). The stained cells were dried and  
664 dissolved in 33% acetic acid and read at 415nm (safranin) or 550 nm (crystal violet) to  
665 assess biofilm formation (bottom graph). Growth and biofilm in unsupplemented TSBG  
666 or BHIG medium for each bacterium was used as control. Additionally, 0.1 mg/mL GST-  
667 tagged IAFGP protein, GST alone, P1 peptide or scramble control peptide- sP1 were also  
668 used as controls. The results were pooled from three independent experiments each with

669 4 technical replicates  $\pm$  SEM; representative images of the biofilm plates with two  
670 representative wells per condition are shown below the graph. Statistical significance was  
671 calculated using one-way ANOVA with Dunnett's multiple comparison (\*\*\*\*  $p < 0.0001$ ).

672

673 **Figure S12.**

674 **(A) Select IAFGP and P1 peptide variants bind *S. aureus* and *E. faecalis* bacteria.**

675 Five His-tagged IAFGP peptide variants (i0, i1, i2, i3, and i4) (top blot) and four His-  
676 tagged P1 peptide variants (P1a, P1b, P1c, and P1d) (bottom blot) were generated based  
677 off their original sequence (SI Appendix, Table S5) (12) and tested for binding to  $1.5 \times 10^7$   
678 cells of *S. aureus* (Sa) or *E. faecalis* (E.fs) whole bacteria grown in TSB or BHI  
679 medium respectively. Bound (Associated) or unbound (Supernatant) peptides were  
680 detected by immunoblot analysis using a monoclonal His-tagged antibody ( $\alpha$ -His). Cell  
681 wall bound fraction (Associated) versus unbound (Supernatant) bacterial fractions were  
682 distinguished by using a polyclonal Wheat Germ Agglutinin antibody ( $\alpha$ -WGA) that  
683 detects bacterial peptidoglycan. Among the IAFGP peptide variants only i0 showed most  
684 significant binding to both *S. aureus* and *E. faecalis*. P1a and P1d were the only P1  
685 peptide variants that bound significantly to both *S. aureus* and *E. faecalis*.

686 **(B, C). Only IAFGP or P1 peptide variants that inhibit biofilm bind *S. aureus* and *E.***  
687 ***faecalis* peptidoglycan.**

688 **(B)** His-tagged IAFGP variants (i0, i1, i2, i3, and i4) (top blot) and His-tagged P1 peptide  
689 variants (P1a, P1b, P1c, and P1d) (bottom blot) used in **(A)** were immobilized onto  
690 magnetic His-Tag isolation beads and incubated with muropeptides extracted from *S.*  
691 *aureus* (Sa) or *E. faecalis* (E.fs) grown in TSB or BHI medium respectively. **(C)**  
692 Experiment was similarly performed as in **(B)** but in reverse using biotinylated synthetic  
693 pentapeptides terminating in D-alanine immobilized onto streptavidin-coated magnetic  
694 beads and probed for binding the His-tagged IAFGP (top blot) or P1 peptide variants  
695 (bottom blot). His-tagged IAFGP or P1 peptide variants were detected using a  
696 monoclonal His-tagged antibody ( $\alpha$ -His). Extracted muropeptides from both bacteria was  
697 detected using a polyclonal Wheat Germ Agglutinin antibody ( $\alpha$ -WGA). Biotinylated  
698 synthetic pentapeptide was detected using an infrared (IR)-labeled streptavidin probe.  
699 Associated or Supernatant fractions represent the fractions that were either pulled down



700 with the magnetic bead or remained unbound. Across both panels we observe the IAFGP  
701 peptide variants- i0 and P1 peptide variants- P1a and P1d to significantly bind native  
702 mucopeptides extracted from *S. aureus* or *E. faecalis* (**B**) or to bind the D-alanine  
703 terminating synthetic pentapeptide (**C**).

704 **Supporting Information- References**

705

- 706 1. Telford SR, 3rd, *et al.* (1996) Perpetuation of the agent of human granulocytic  
707 ehrlichiosis in a deer tick-rodent cycle. *Proceedings of the National Academy of*  
708 *Sciences of the United States of America* 93(12):6209-6214.
- 709 2. Hodzic E, *et al.* (1998) Granulocytic ehrlichiosis in the laboratory mouse. *The*  
710 *Journal of infectious diseases* 177(3):737-745.
- 711 3. Smith AA, *et al.* (2016) Cross-Species Interferon Signaling Boosts Microbicidal  
712 Activity within the Tick Vector. *Cell host & microbe* 20(1):91-98.
- 713 4. Caporaso JG, *et al.* (2012) Ultra-high-throughput microbial community analysis  
714 on the Illumina HiSeq and MiSeq platforms. *The ISME journal* 6(8):1621-1624.
- 715 5. Masella AP, Bartram AK, Truszkowski JM, Brown DG, & Neufeld JD (2012)  
716 PANDAseq: paired-end assembler for illumina sequences. *BMC Bioinformatics*  
717 13:31.
- 718 6. Schmieder R & Edwards R (2011) Quality control and preprocessing of  
719 metagenomic datasets. *Bioinformatics* 27(6):863-864.
- 720 7. Caporaso JG, *et al.* (2010) QIIME allows analysis of high-throughput community  
721 sequencing data. *Nature methods* 7(5):335-336.
- 722 8. McDonald D, *et al.* (2012) An improved Greengenes taxonomy with explicit  
723 ranks for ecological and evolutionary analyses of bacteria and archaea. *The ISME*  
724 *journal* 6(3):610-618.
- 725 9. Lozupone C & Knight R (2005) UniFrac: a new phylogenetic method for  
726 comparing microbial communities. *Applied and environmental microbiology*  
727 71(12):8228-8235.
- 728 10. Narasimhan S, *et al.* (2014) Gut microbiota of the tick vector *Ixodes scapularis*  
729 modulate colonization of the Lyme disease spirochete. *Cell host & microbe*  
730 15(1):58-71.
- 731 11. Thepparit C, *et al.* (2011) Isolation of a rickettsial pathogen from a non-  
732 hematophagous arthropod. *PloS one* 6(1):e16396.
- 733 12. Heisig M, *et al.* (2014) Antivirulence properties of an antifreeze protein. *Cell*  
734 *reports* 9(2):417-424.

- 735 13. Abraham NM & Jefferson KK (2012) *Staphylococcus aureus* clumping factor B  
736 mediates biofilm formation in the absence of calcium. *Microbiology* 158(Pt  
737 6):1504-1512.
- 738 14. Cywes-Bentley C, *et al.* (2013) Antibody to a conserved antigenic target is  
739 protective against diverse prokaryotic and eukaryotic pathogens. *Proceedings of*  
740 *the National Academy of Sciences of the United States of America*  
741 110(24):E2209-2218.
- 742 15. Cue D, Lei MG, & Lee CY (2012) Genetic regulation of the intercellular adhesion  
743 locus in staphylococci. *Frontiers in cellular and infection microbiology* 2:38.
- 744 16. Weidenmaier C, *et al.* (2004) Role of teichoic acids in *Staphylococcus aureus*  
745 nasal colonization, a major risk factor in nosocomial infections. *Nat Med*  
746 10(3):243-245.
- 747 17. Liu L, *et al.* (2012) *Ixodes scapularis* JAK-STAT pathway regulates tick  
748 antimicrobial peptides, thereby controlling the agent of human granulocytic  
749 anaplasmosis. *The Journal of infectious diseases* 206(8):1233-1241.
- 750 18. Narasimhan S, *et al.* (2007) A tick antioxidant facilitates the Lyme disease agent's  
751 successful migration from the mammalian host to the arthropod vector. *Cell host*  
752 *& microbe* 2(1):7-18.
- 753 19. Neelakanta G, Sultana H, Fish D, Anderson JF, & Fikrig E (2010) *Anaplasma*  
754 *phagocytophilum* induces *Ixodes scapularis* ticks to express an antifreeze  
755 glycoprotein gene that enhances their survival in the cold. *The Journal of clinical*  
756 *investigation* 120(9):3179-3190.
- 757 20. de Jonge BL, Chang YS, Gage D, & Tomasz A (1992) Peptidoglycan  
758 composition of a highly methicillin-resistant *Staphylococcus aureus* strain. The  
759 role of penicillin binding protein 2A. *The Journal of biological chemistry*  
760 267(16):11248-11254.
- 761 21. Desmarais SM, De Pedro MA, Cava F, & Huang KC (2013) Peptidoglycan at its  
762 peaks: how chromatographic analyses can reveal bacterial cell wall structure and  
763 assembly. *Mol Microbiol* 89(1):1-13.
- 764 22. Dorr T, *et al.* (2014) A novel peptidoglycan binding protein crucial for PBP1A-  
765 mediated cell wall biogenesis in *Vibrio cholerae*. *PLoS Genet* 10(6):e1004433.

- 766 23. Dorr T, *et al.* (2016) A cell wall damage response mediated by a sensor  
767 kinase/response regulator pair enables beta-lactam tolerance. *Proceedings of the*  
768 *National Academy of Sciences of the United States of America* 113(2):404-409.
- 769 24. Kuhner D, Stahl M, Demircioglu DD, & Bertsche U (2014) From cells to  
770 mucopeptide structures in 24 h: peptidoglycan mapping by UPLC-MS. *Scientific*  
771 *reports* 4:7494.
- 772 25. Boneca IG, Xu N, Gage DA, de Jonge BL, & Tomasz A (1997) Structural  
773 characterization of an abnormally cross-linked mucopeptide dimer that is  
774 accumulated in the peptidoglycan of methicillin- and cefotaxime-resistant mutants  
775 of *Staphylococcus aureus*. *The Journal of biological chemistry* 272(46):29053-  
776 29059.
- 777 26. De Jonge BL, Gage D, & Xu N (2002) The carboxyl terminus of peptidoglycan  
778 stem peptides is a determinant for methicillin resistance in *Staphylococcus*  
779 *aureus*. *Antimicrobial agents and chemotherapy* 46(10):3151-3155.
- 780 27. Desmarais SM, *et al.* (2015) High-throughput, Highly Sensitive Analyses of  
781 Bacterial Morphogenesis Using Ultra Performance Liquid Chromatography. *The*  
782 *Journal of biological chemistry* 290(52):31090-31100.
- 783 28. Christensen GD, *et al.* (1985) Adherence of coagulase-negative staphylococci to  
784 plastic tissue culture plates: a quantitative model for the adherence of  
785 staphylococci to medical devices. *Journal of clinical microbiology* 22(6):996-  
786 1006.
- 787 29. Soares CA, *et al.* (2005) Capillary feeding of specific dsRNA induces silencing of  
788 the isac gene in nymphal *Ixodes scapularis* ticks. *Insect Mol Biol* 14(4):443-452.
- 789 30. Parry BR, *et al.* (2014) The bacterial cytoplasm has glass-like properties and is  
790 fluidized by metabolic activity. *Cell* 156(1-2):183-194.

791

**Table S1. Average number of reads across each experimental cohort**

| Sample type        | Number of ticks evaluated | Average number of reads (pre-exclusion) | Average number of reads (post-exclusion) |
|--------------------|---------------------------|-----------------------------------------|------------------------------------------|
| Clean              | 12                        | 325220.25                               | 241211.7389                              |
| Anaplasma infected | 11                        | 429221.8                                | 225764.5943                              |
| sP1 injected       | 13                        | 501411.231                              | 336372.5214                              |
| P1 injected        | 16                        | 391913.438                              | 259347.0567                              |
| Negative control   | -                         | 413                                     |                                          |

**Table S2. Relative abundance of genera within negative controls (413 reads)**

| Genera                | Relative abundance (reads) | Relative abundance (%) |
|-----------------------|----------------------------|------------------------|
| Other                 | 407                        | 98.5%                  |
| <i>Serratia</i>       | 4                          | 1%                     |
| <i>Staphylococcus</i> | 2                          | 0.5%                   |

“Other” bacterial genera are those that have yet to be taxonomically defined

**Table S3. Genera with >1% relative abundance that were only observed within some experimental cohorts**

| Sample pair                        | Genera not included in current analysis                                                                                                                          |
|------------------------------------|------------------------------------------------------------------------------------------------------------------------------------------------------------------|
| Clean or <i>Anaplasma</i> infected | <i>Streptococcus</i> , <i>Elizabethkingia</i> *, <i>Serratia</i> *, <i>Enhydrobacter</i> *, <i>Hydrogenophaga</i> *, <i>Geobacillus</i> *, <i>Tepidimonas</i> ** |
| sP1 or P1 injected                 | <i>Anaerococcus</i> , <i>Peptoniphilus</i> , <i>Dermacoccus</i> , <i>Escherichia</i> , <i>Stenotrophomonas</i> , <i>Tepidimonas</i> **                           |
| D-alanine or D-serine injected     | <i>Elizabethkingia</i> *, <i>Serratia</i> *, <i>Enhydrobacter</i> *, <i>Hydrogenophaga</i> *, <i>Geobacillus</i> *, <i>Enterobacteriaceae</i>                    |

“Genera not currently included in the figures since they did not adhere to one criteria- consistency across all experimental groups (see Material and Methods). However, these genera were found at >1% within each treatment pair and could contribute to the diversity.\* Common to Clean/Ap and D-alanine/D-serine sample pairs; \*\* Common to Clean/Ap and sP1/P1 sample pairs. All other genera were only found once within their respective sample pair.

**Table S4. Muropeptides of *S. aureus* SA113 isolated from TSB or 125mM D-serine cultures and analysed by UPLC-MS/MS.**

| Peak | Observed Masses (M+H <sup>+</sup> ) |           | Muropeptide composition       |       |       |
|------|-------------------------------------|-----------|-------------------------------|-------|-------|
|      | TSB                                 | D-Serine  | Stem peptide                  | D-ala | D-ser |
| 1    | 984.4727                            | 984.4734  | Penta                         | 1     | 1     |
| 2    | -                                   | 1057.4890 | Penta (1-Gly)                 |       | 2     |
| 3    | -                                   | 1285.5750 | Penta (5-Gly)                 |       | 2     |
| 4    | -                                   | 1041.4968 | Penta (1-Gly)                 | 1     | 1     |
| 5    | -                                   | 1098.5220 | Penta (2-Gly)                 | 1     | 1     |
|      | -                                   | 1155.5456 | Penta (3-Gly)                 | 1     | 1     |
|      | -                                   | 1269.5810 | Penta (5-Gly)                 | 1     | 1     |
| 6    | 1182.5515                           | 1182.5552 | Tetra (5-Gly)                 | 1     |       |
|      | 1025.5025                           | 1025.4993 | Penta (1-Gly)                 | 2     |       |
| 7    | 1253.5923                           | 1253.5813 | Penta (5-Gly)                 | 2     |       |
| 9    | -                                   | 2466.1132 | Penta-tetra (10-Gly)          |       | 3     |
| 10   | -                                   | 2222.2082 | Penta-tetra (6-Gly)           | 1     | 2     |
| 11   | -                                   | 2450.1260 | Penta-tetra (10-Gly)          | 1     | 2     |
| 12   | -                                   | 2206.2204 | Penta-tetra (6-Gly)           | 2     | 1     |
| 13   | -                                   | 2434.1262 | Penta-tetra (10-Gly)          | 2     | 1     |
| 14   | -                                   | 2346.0880 | ND                            |       |       |
| 15   | -                                   | 3613.9879 | Penta-tetra-tetra (15-Gly)    | 2     | 2     |
| 16   | -                                   | 3597.9757 | Penta-tetra-tetra (15-Gly)    | 3     | 1     |
| 2'   | 897.4406                            | -         | Tetra                         | 1     |       |
| 3'   | 968.4808                            | -         | Penta                         | 2     |       |
| 4'   | 1068.5111                           | -         | Tetra (3-Gly)                 | 1     |       |
|      | 1182.5528                           | -         | Tetra (5-Gly)                 | 1     |       |
| 5'   | 1239.5702                           | -         | Tetra (6-Gly)                 | 1     |       |
| 5a'  | 954.4628                            | -         | Tetra (1-Gly)                 | 1     |       |
| 8'   | 1039.5063                           | -         | Penta                         | 3     |       |
| 9'   | 1183.5802                           | -         | ND                            |       |       |
|      | 1297.6155                           | -         | ND                            |       |       |
| 10'  | 1164.5397                           | -         | ND                            |       |       |
| 11'  | 2347.0940                           | -         | Tetra-tetra (10-Gly)          | 2     |       |
| 12'  | 2418.2708                           | -         | Penta-tetra (10-Gly)          | 3     |       |
| 13'  | 2418.3446                           | -         | Penta-tetra (10-Gly)          | 3     |       |
| 14'  | 2328.2710                           | -         | Tetra-tetra (cyclic) (10-Gly) | 2     |       |
| 15'  | 3581.8495                           | -         | Penta-tetra-tetra (15-Gly)    | 4     |       |

Peak numbers are defined according to **Figure S4A**; Tetra or Penta stem peptide refers to: L-Ala-D-Gln-L-Lys-D-Ala(-D-Ala) attached to GluNAc-MurNAc. The structures are depicted in **Figure S4C**. The Glycine (Gly) residues, represented in the parenthesis, are involved in the interpeptide bridge and are attached to D-Lys residue in the stem peptide and is represented as sum of all Gly residues present in each muropeptide. D-alanine (D-ala) and D-Serine (D-ser) columns represents total number of D-alanine or D-serine residues present in the peptide moieties; ND- structures not defined.

**Table S5. IAFGP and P1 peptide variants utilized for bacterial and peptidoglycan binding and biofilm assays.**

|                       | Peptide Name | Notes                                           | Sequence                                    |
|-----------------------|--------------|-------------------------------------------------|---------------------------------------------|
| <b>IAFGP variants</b> | i0           | Native IAFGP sequence aa 111-134                | PARKAR AATPATPATAATPATAAT                   |
|                       | i1           | 'AAT' triplets of P0 replaced by 'PAT' triplets | PARKAR PATPATPATPATPATPAT                   |
|                       | i2           | 'PARKAR' leader with double 'AAT/PAT' repeats   | PARKAR AATPATPATAATPATAATAATPATPATAATPATAAT |
|                       | i3           | 'AAT & PAT' triplets without 'PARKAR' leader    | AATPATPATA ATPATAAT                         |
|                       | i4           | 'PARKAR' in the middle of peptide               | AATPATAATP ARKARAATPATPAT                   |
| <b>P1 variants</b>    | P1a          | P2 with four 'AAT' repeats                      | PARKAR AATAATAATAAT                         |
|                       | P1b          | P2 with two 'AAT' repeats                       | PARKAR AATAAT                               |
|                       | P1c          | two 'AAT', 'PARKAR', two 'AAT'                  | AATAATPARKARAATAAT                          |
|                       | P1d          | six 'AAT' triplets without 'PARKAR'             | AATAATAATAATAATAAT                          |

IAFGP or P1 peptide variants were generated based off the original full length IAFGP or P1 peptide sequence (6). His-tagged variants were also generated with the 6x-His tag at the N terminus of each peptide.

**Table S6. Primers utilized in this study****Quantitative PCR primers**

| <b>Gene Name</b>             | <b>Forward primer sequence</b> | <b>Reverse primer sequence</b> |
|------------------------------|--------------------------------|--------------------------------|
| <i>iafgp</i>                 | ggatacgggaagcagtctg            | ttcatttgatttaaacatagaag        |
| <i>peritrophin-1</i>         | atgccgaataaggtcgactg           | agtggaatctggacggaatg           |
| <i>peritrophin-2</i>         | agaagggtattggccttcaac          | tacaggctacgcaacaaacg           |
| <i>peritrophin-3</i>         | tgtgacaagacgacctccag           | catcgagttcttggcctgt            |
| <i>peritrophin-4</i>         | acctgtcgacggatgtgact           | cctcgacgtgtagctgtag            |
| <i>peritrophin-5</i>         | acctgggattccagtgcc             | ccagccgtgcacgttgag             |
| <i>Anaplasma 16S rRNA</i>    | ggtgagtaatgcataggaatc          | gctcatctaatacgataaatc          |
| <i>Pseudomonas 16S rRNA</i>  | actttaagtgggaggaagg            | acacaggaattccaccacc            |
| <i>Enterococcus 23S rRNA</i> | agaaattccaaacgaactg            | cagtgtctacctccatcatt           |
| Universal bacterial 16S rRNA | agagtttgatcctggctcag           | catgtgcctcccgtaggagt           |
| Tick <i>actin</i>            | ggcgacgtagcag                  | ggtatcgtgctcgactc              |

**Double stranded RNA Primers**

| <b>Gene Name</b>     | <b>Forward primer sequence</b>            | <b>Reverse primer sequence</b>           |
|----------------------|-------------------------------------------|------------------------------------------|
| <i>iafgp</i>         | taatacgactcactatagggctacaccagctaggaagg    | taatacgactcactataggggtgccaccgtagaatcc    |
| <i>peritrophin-1</i> | taatacgactcactatagggcggtgtcttattcctgtc    | taatacgactcactatagggcgtaatggctgtagatgc   |
| <i>peritrophin-2</i> | taatacgactcactataggggtgtcctcagcatctctag   | taatacgactcactatagggaaatcccttctggcagttg  |
| <i>peritrophin-4</i> | taatacgactcactatagggacgatgtctaccagaactc   | taatacgactcactatagggaccctccagttgtagttg   |
| <i>gfp</i>           | taatacgactcactatagggcgacgtaaacggccacaagtt | taatacgactcactatagggcgcggtctttagttgccgtc |



Figure S1.

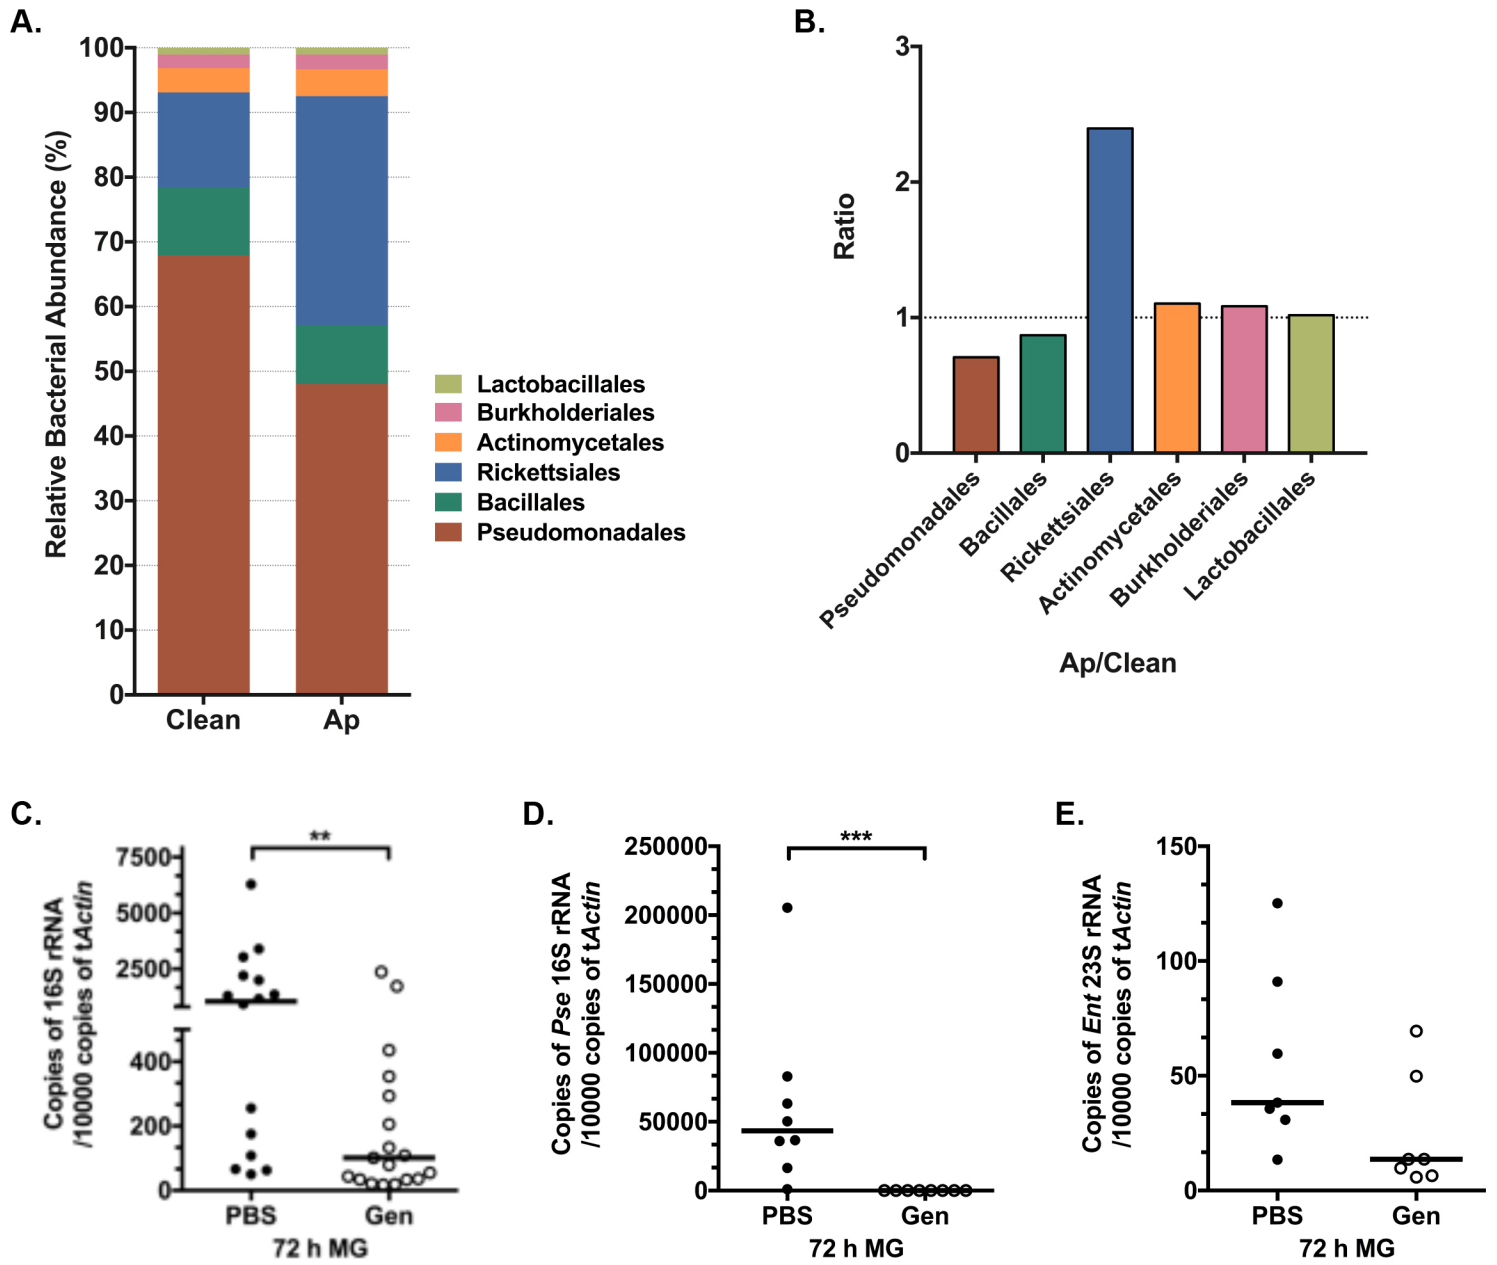

Figure S2.

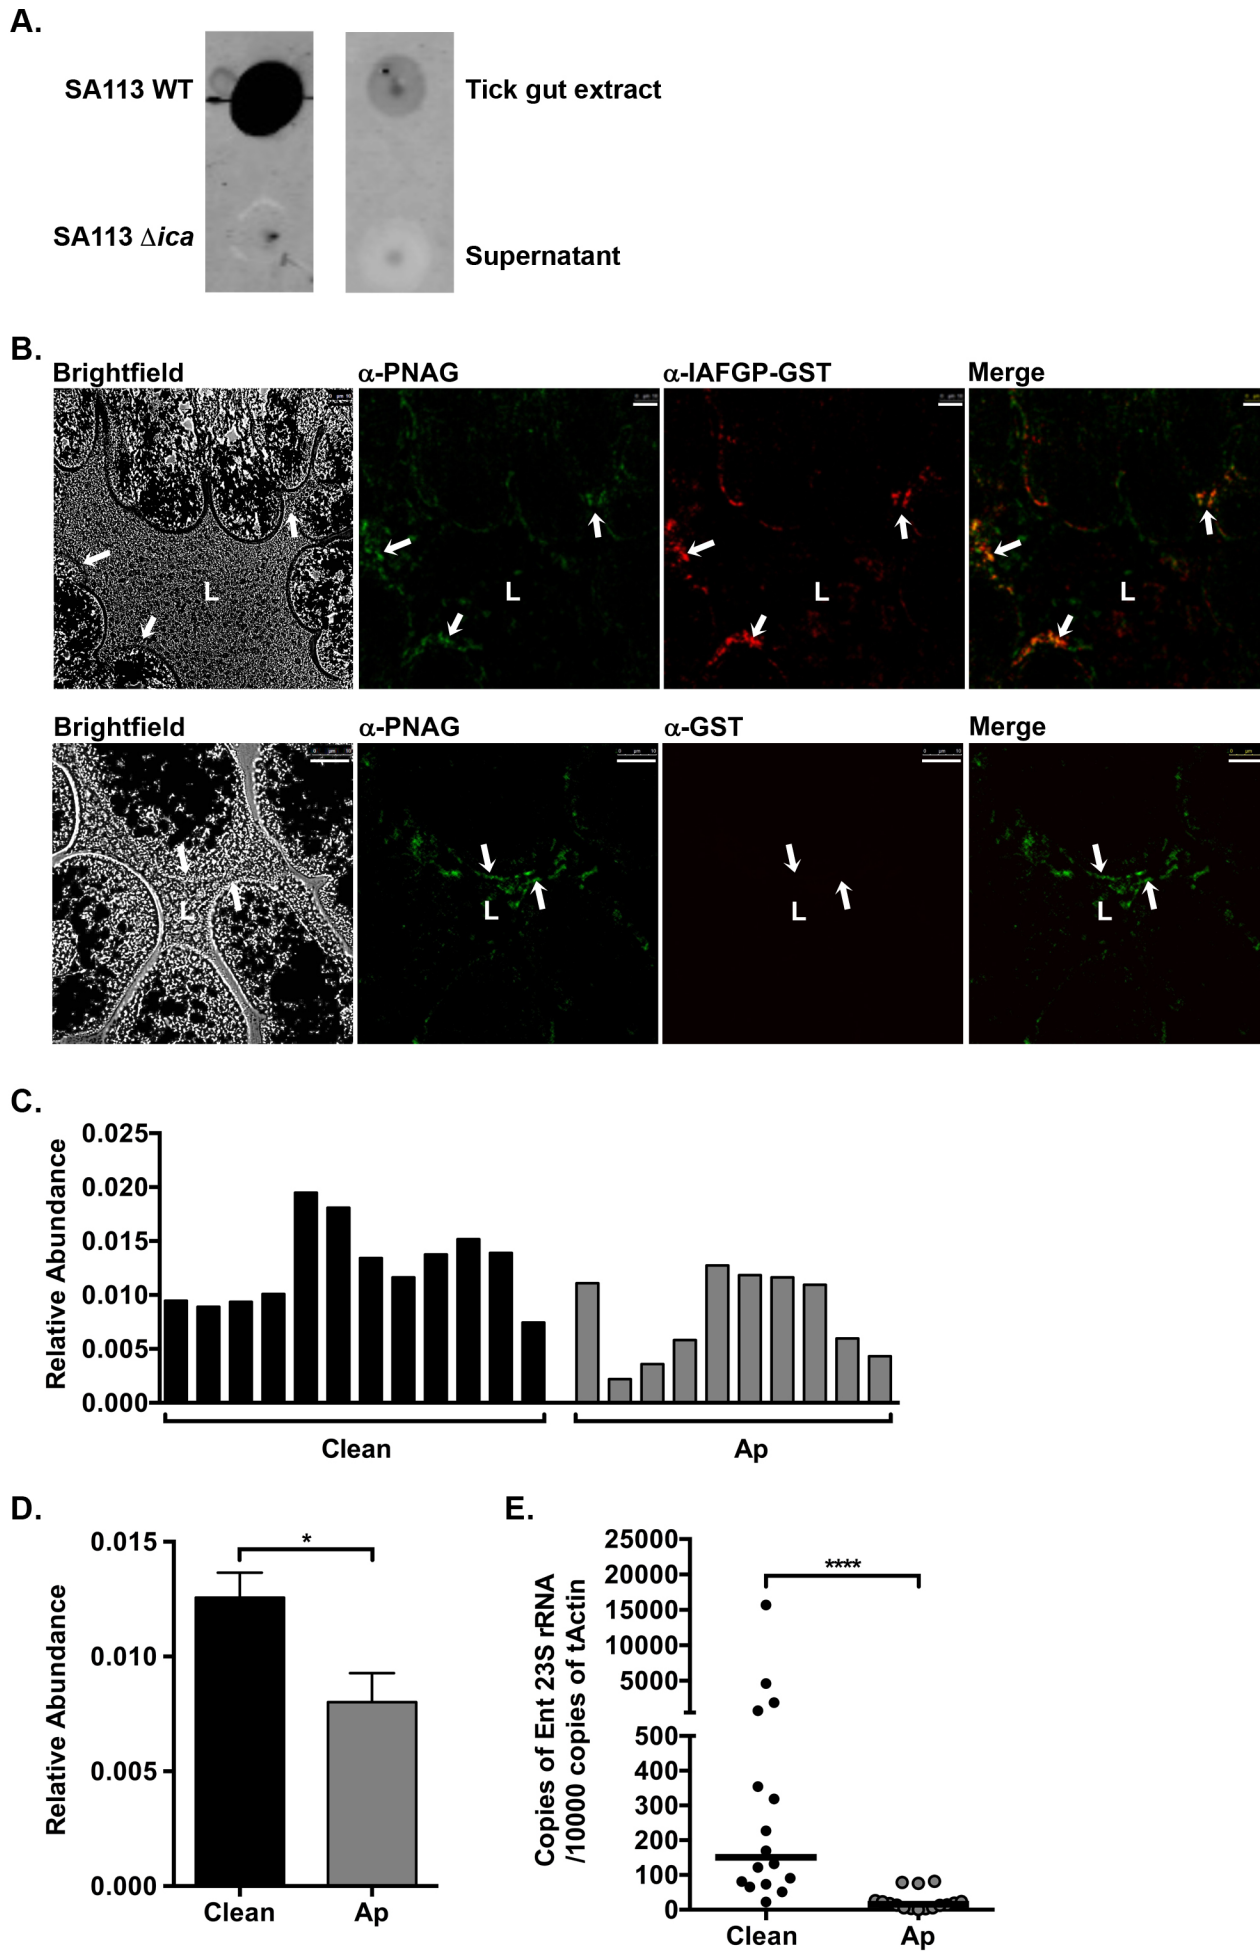

**Figure S3.**

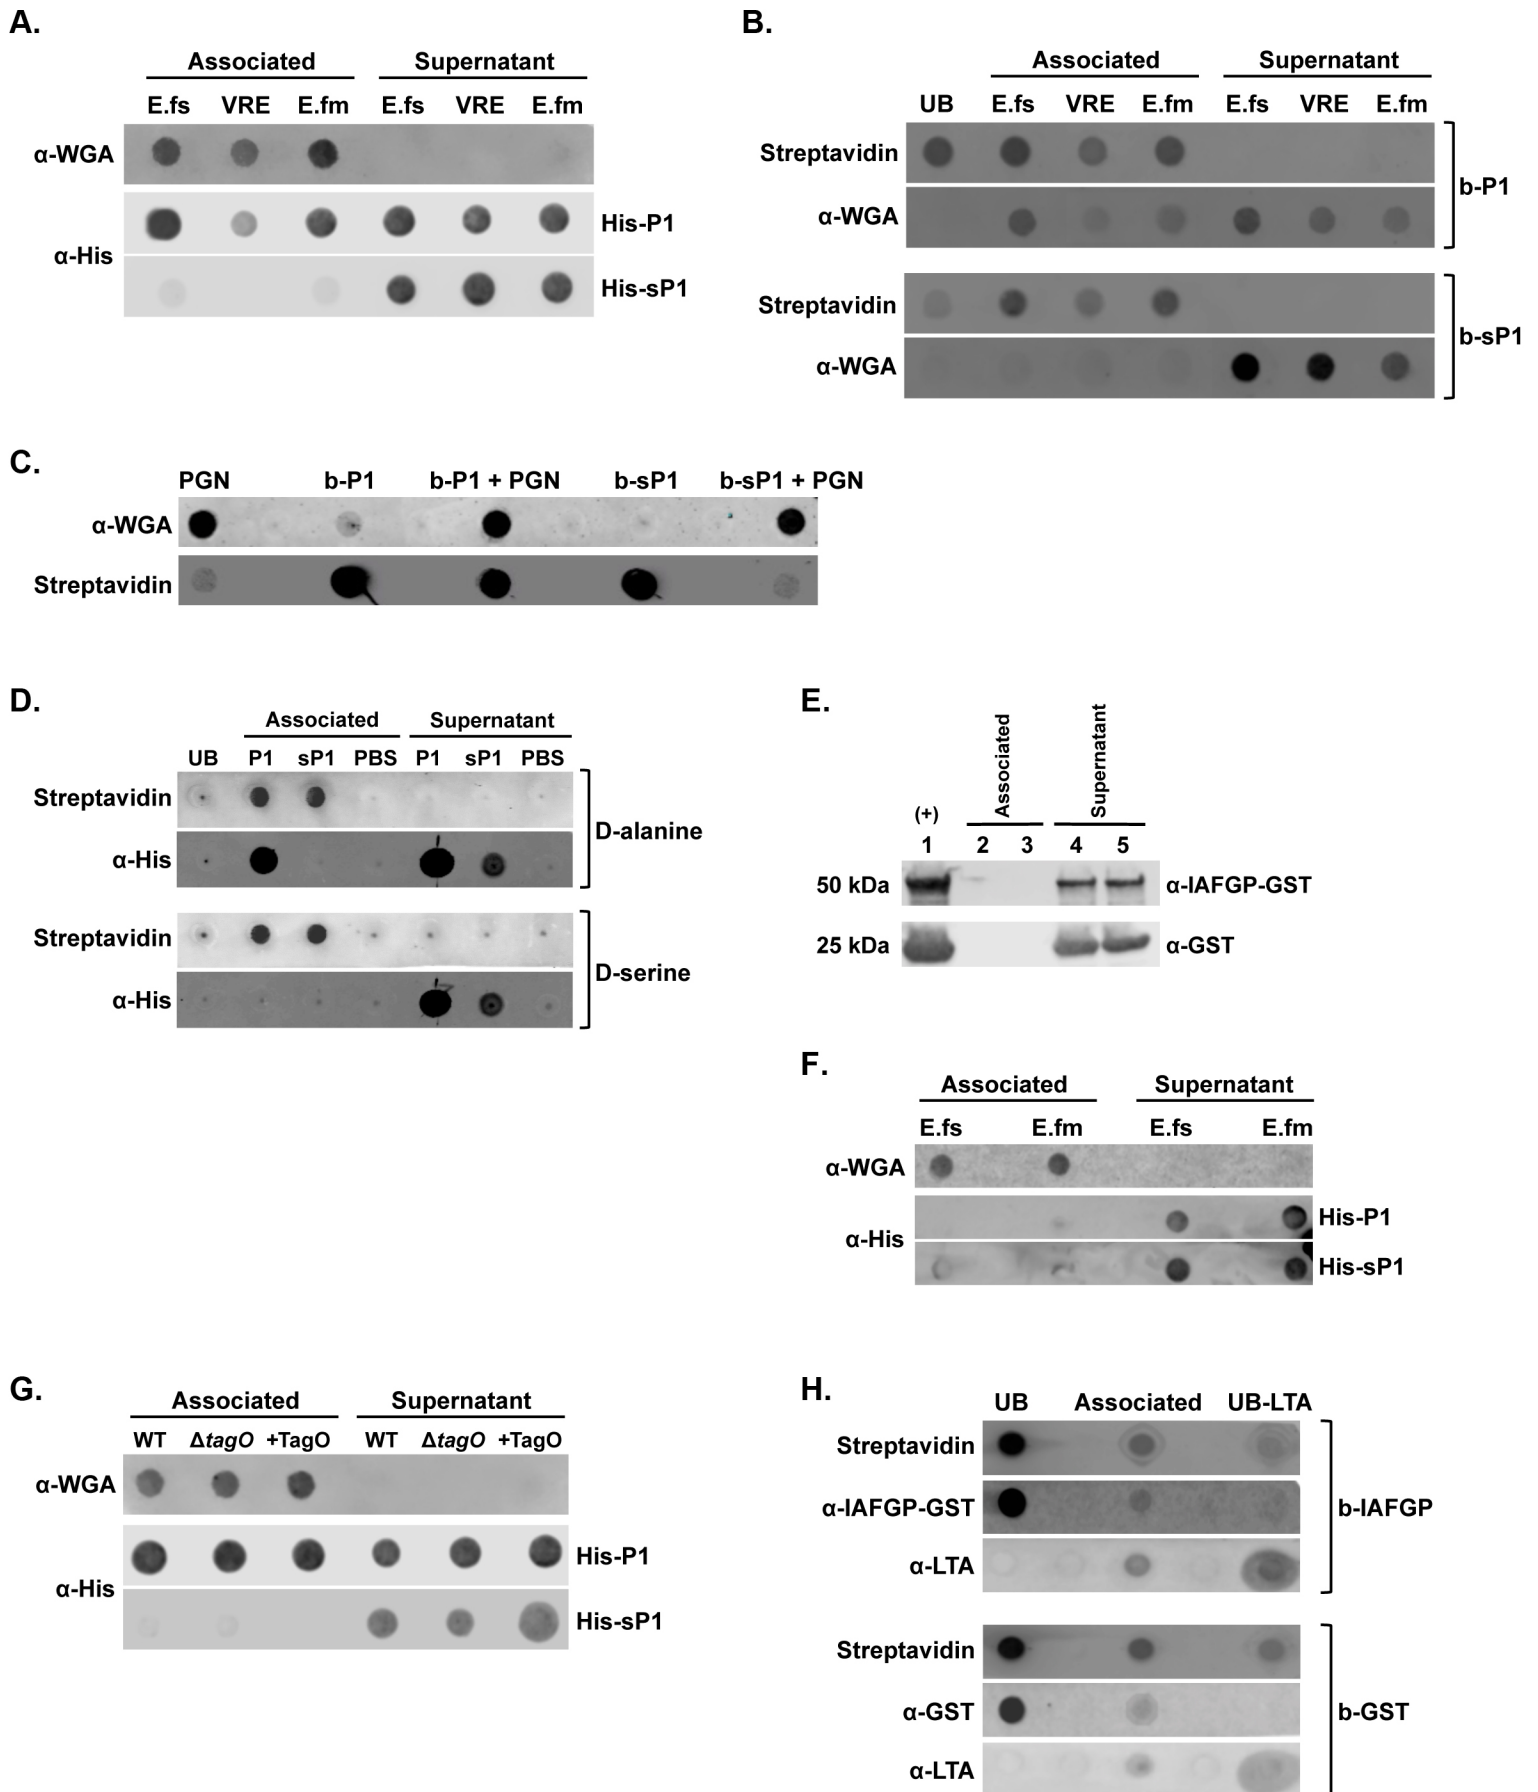

Figure S4.

A.

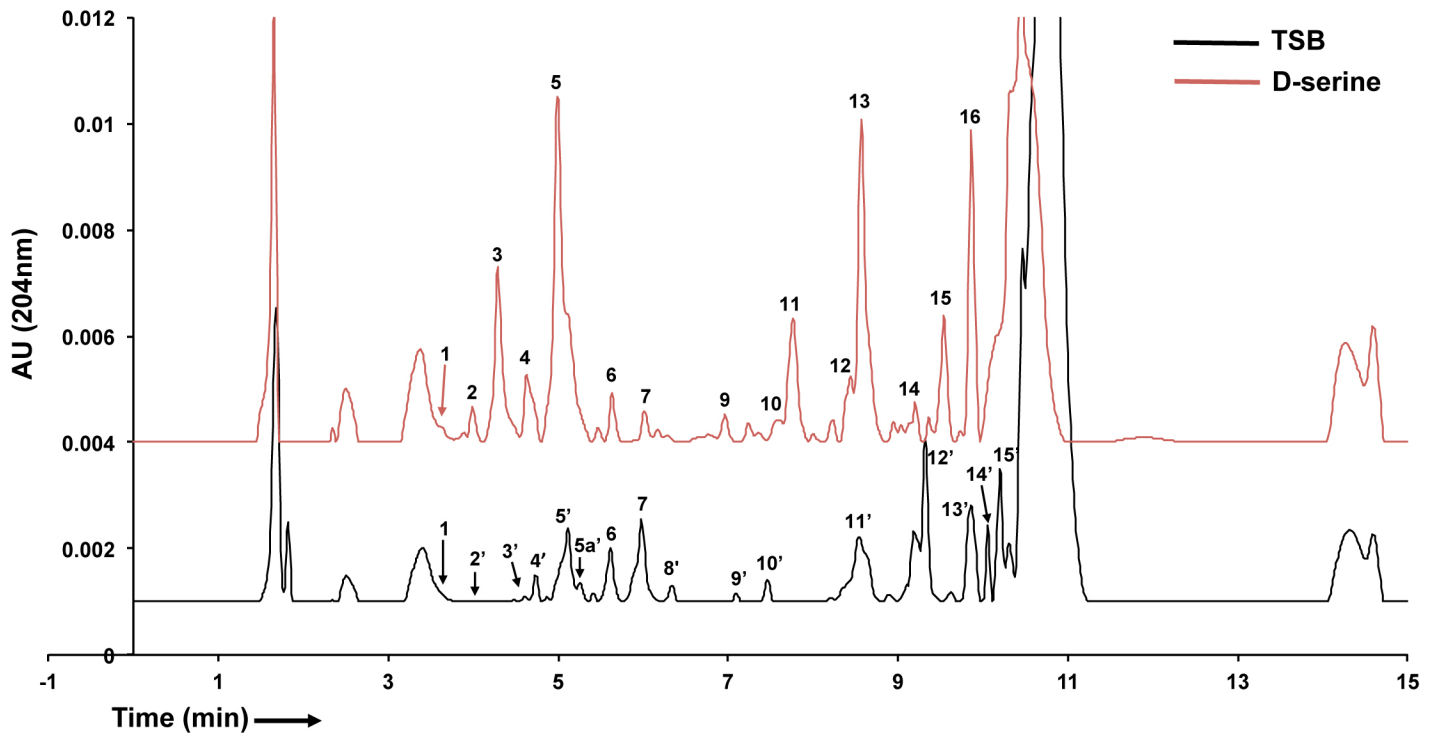

B.

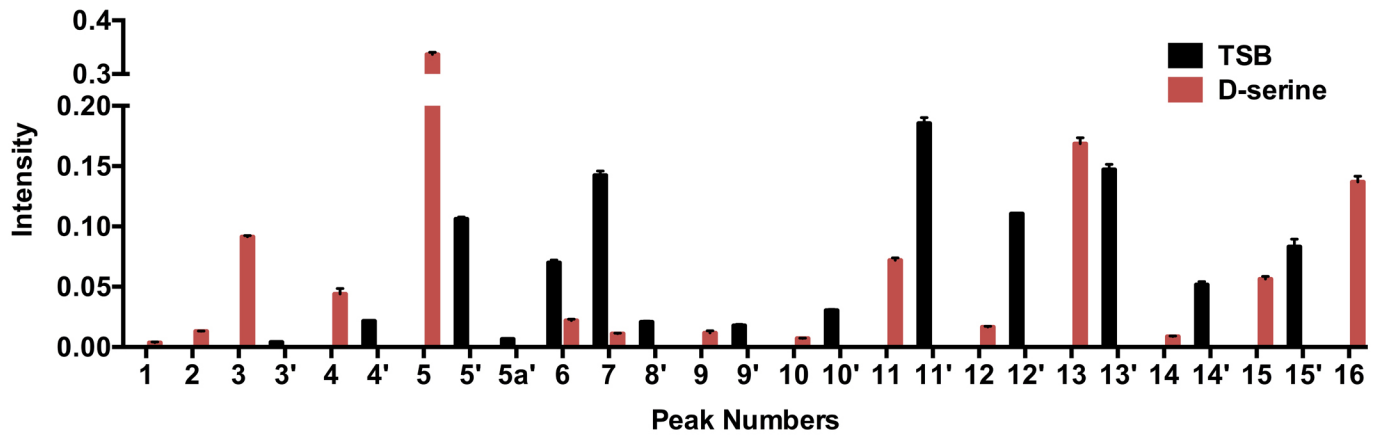

C.

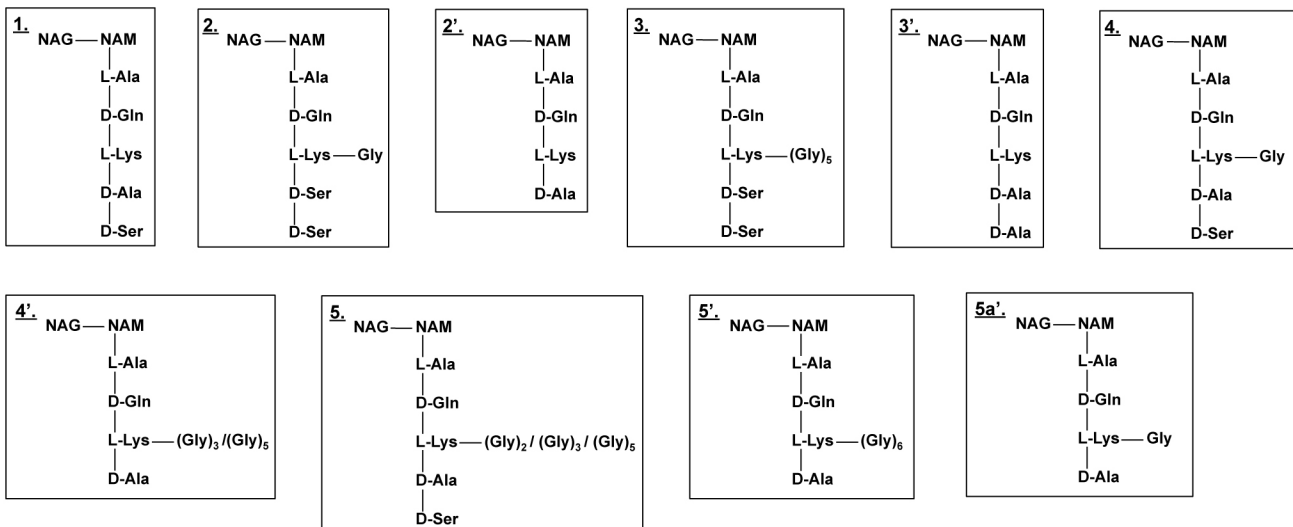

Figure S4 (contd.)

C.

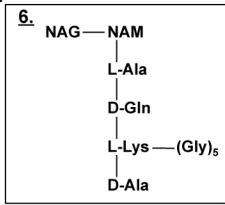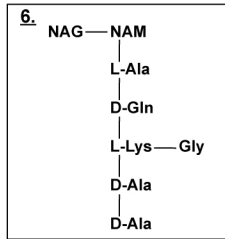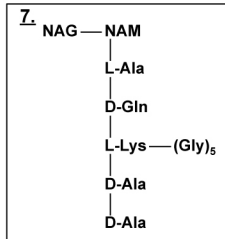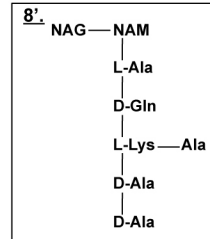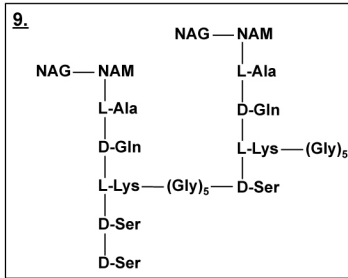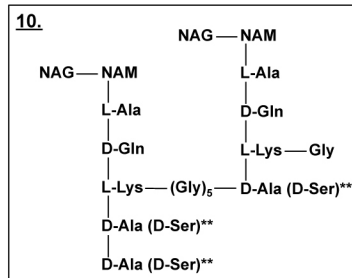

\*\*2 Serine's, Location unknown

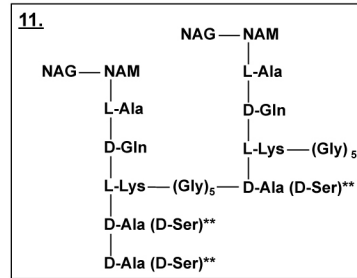

\*\*2 Serine's, Location unknown

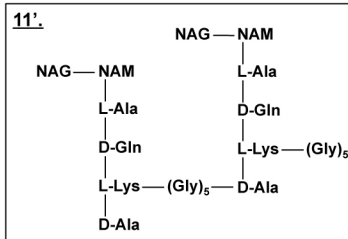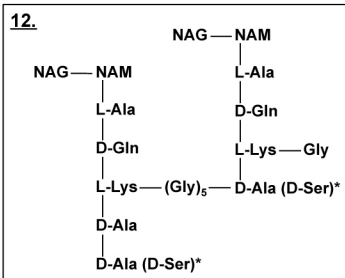

\*1 Serine, Location unknown

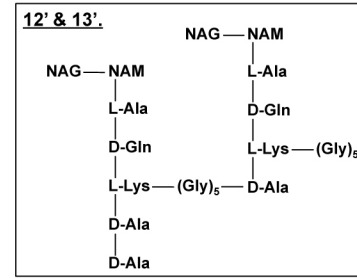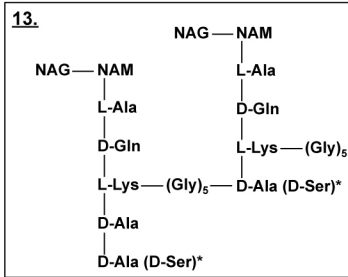

\*1 Serine, Location unknown

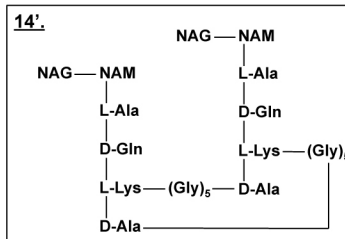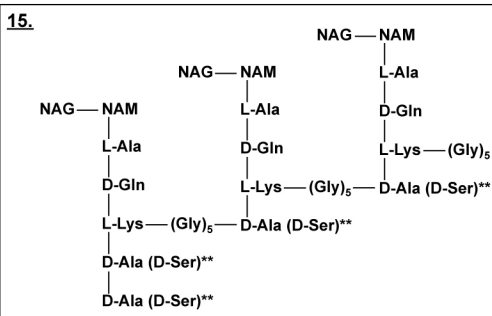

\*\*2 Serine's, Location unknown

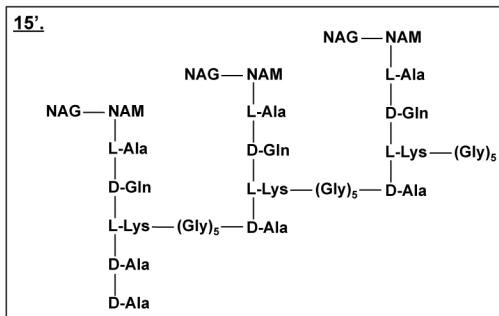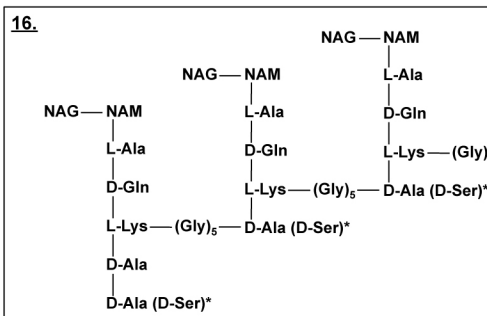

\*1 Serine, Location unknown

Figure S4 (contd.)

D.

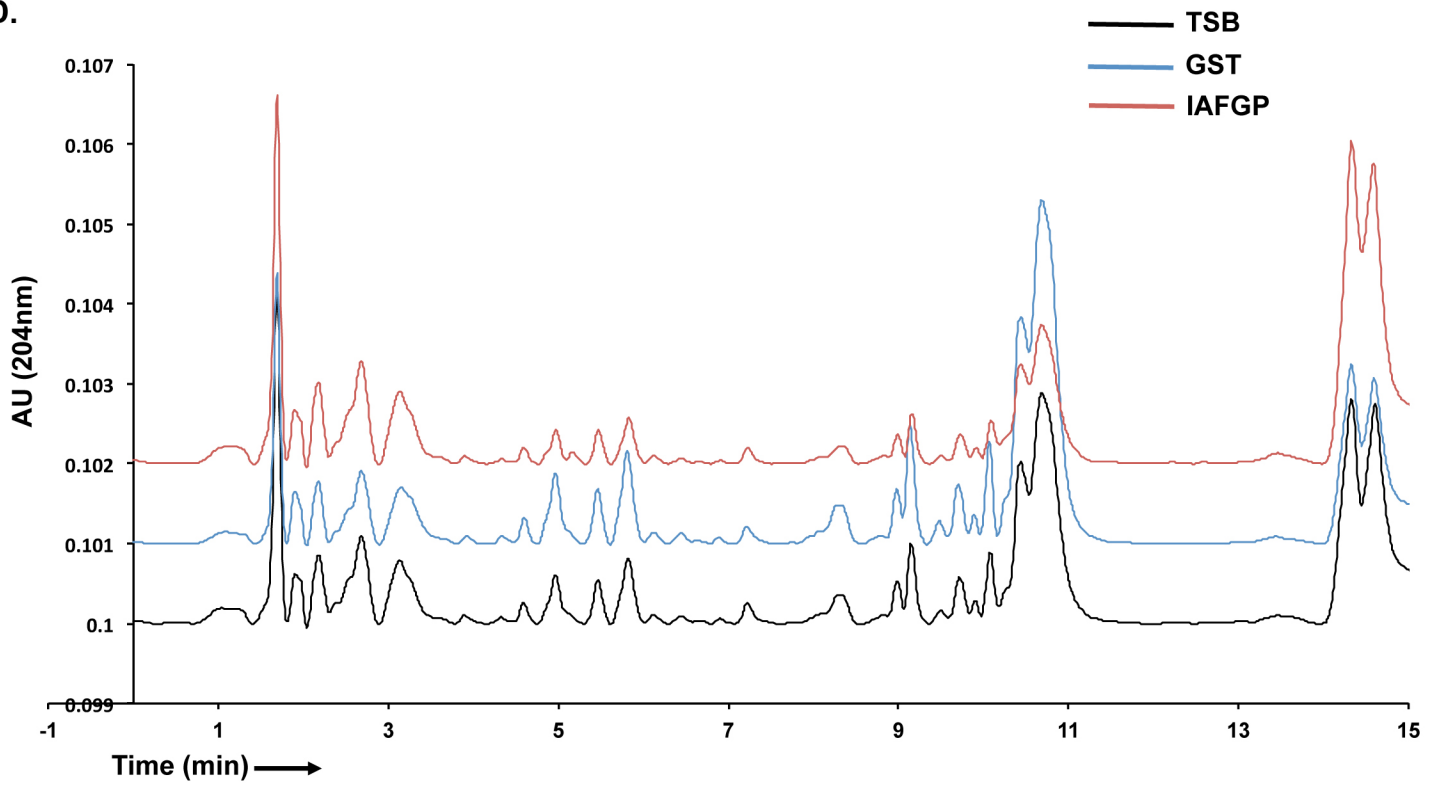

E.

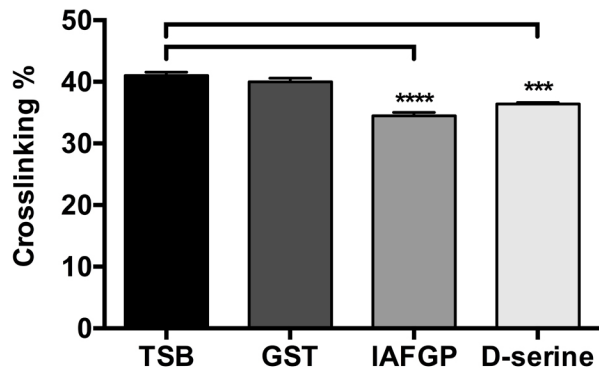

Figure S5.

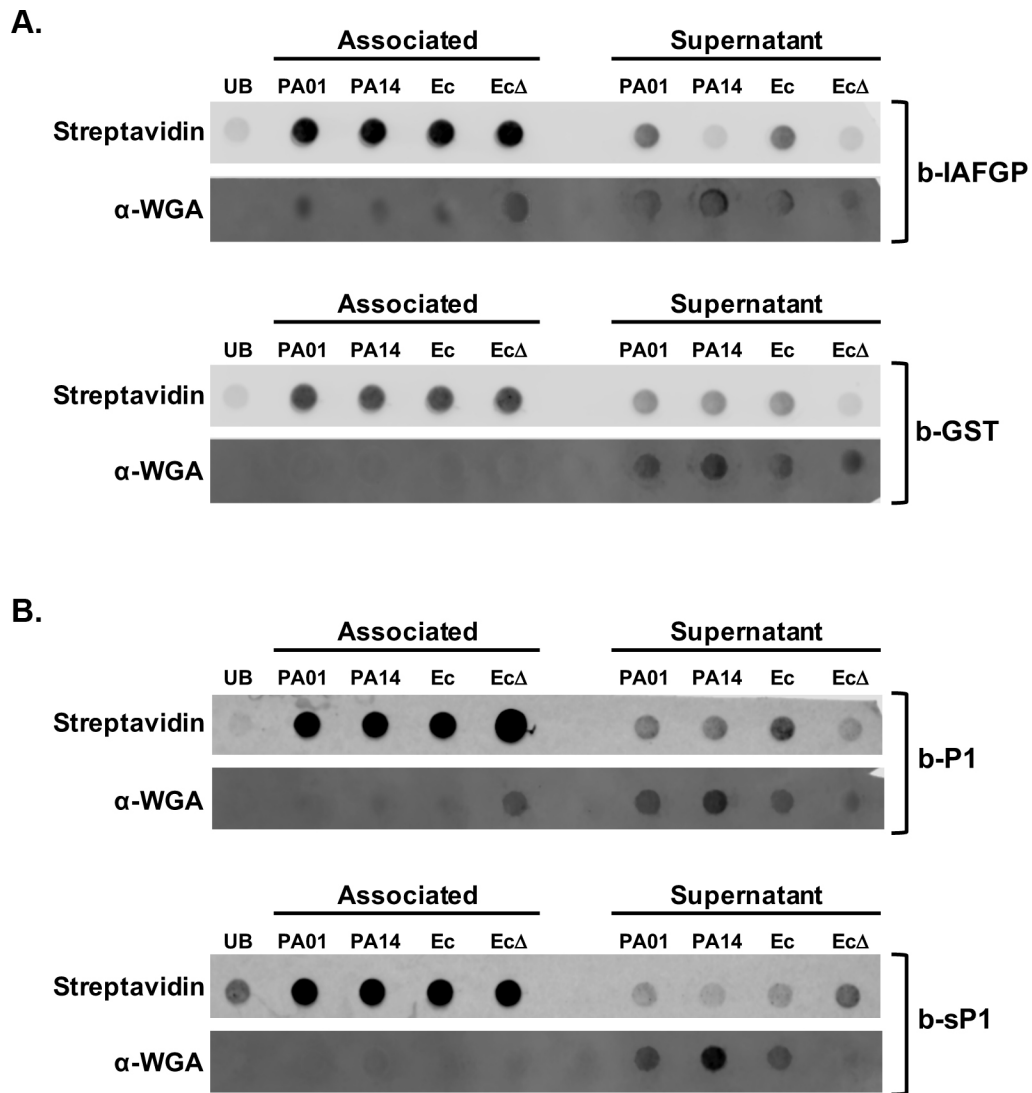

Figure S5 (contd).

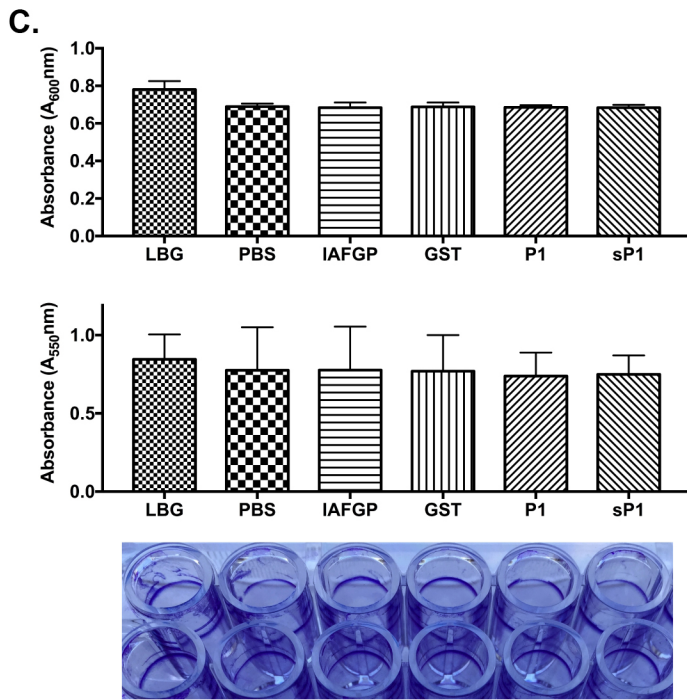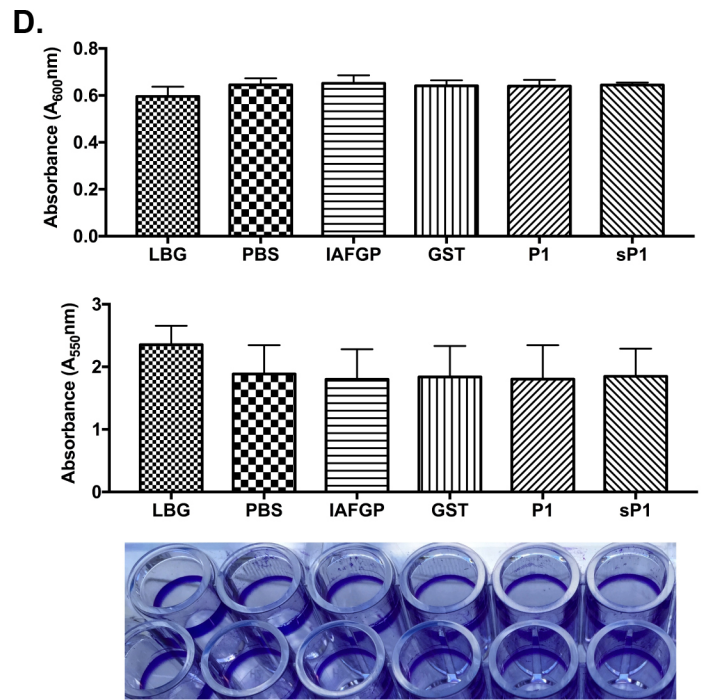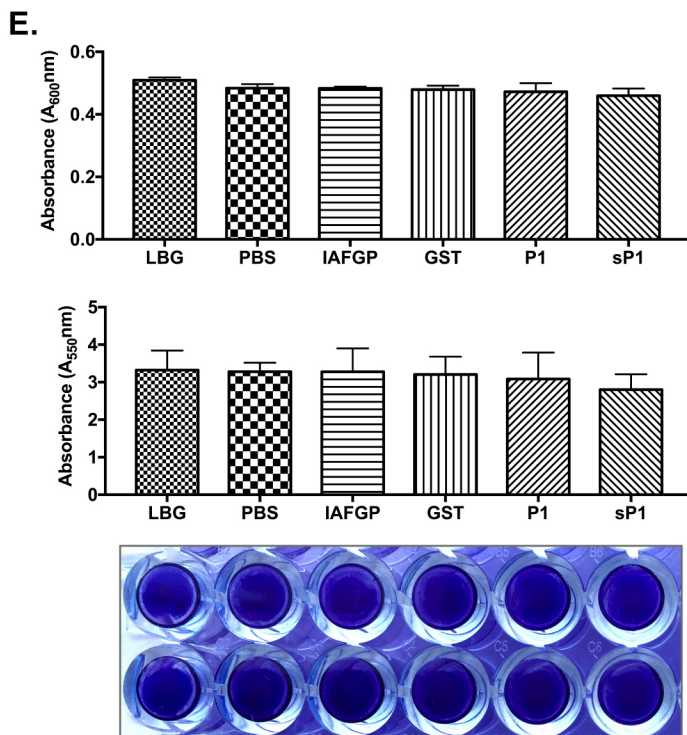



Figure S6.

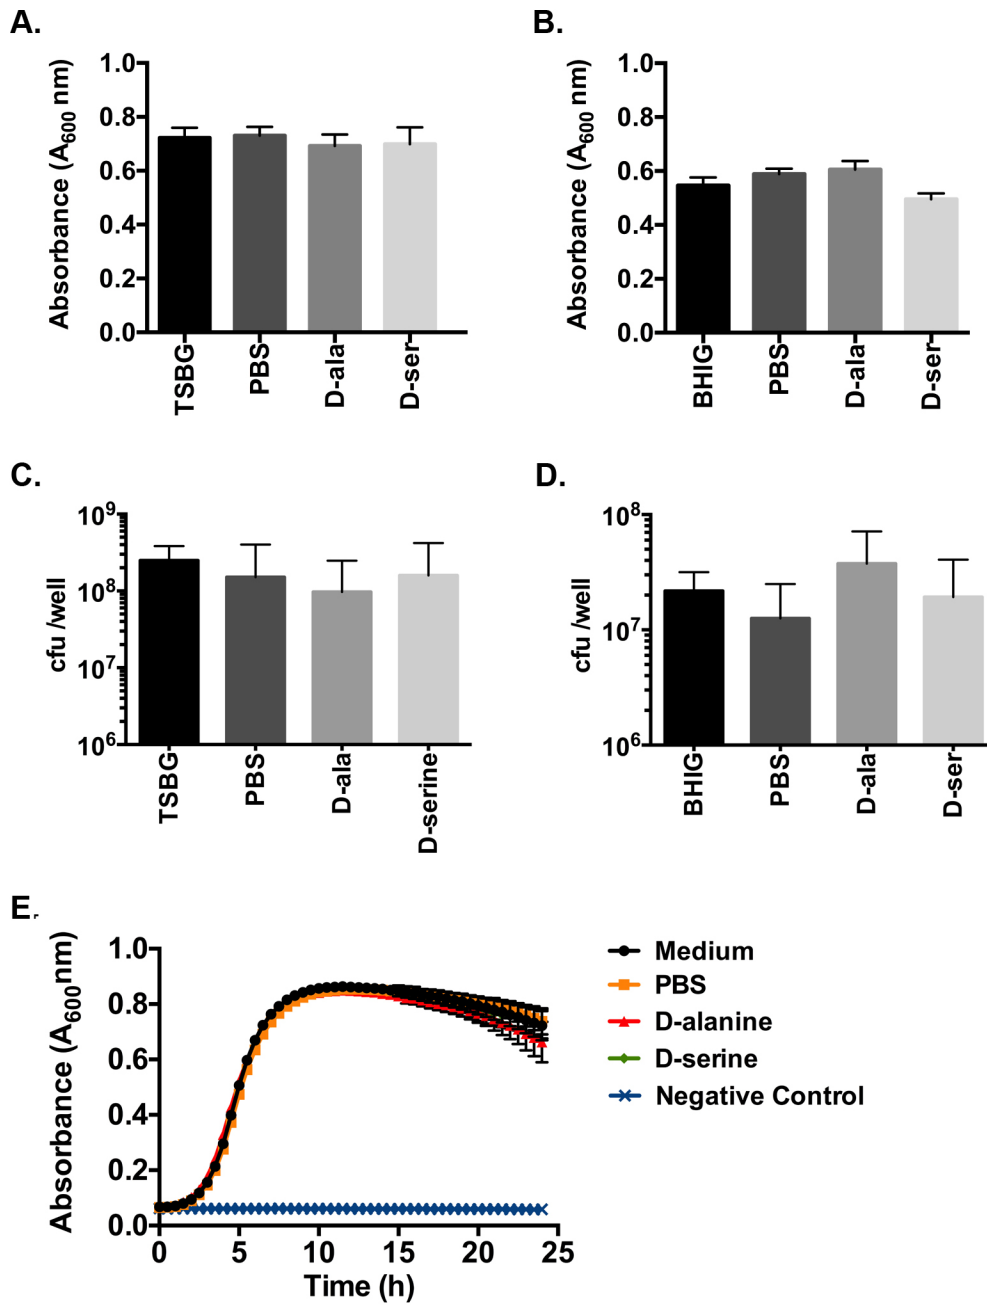

Figure S7.

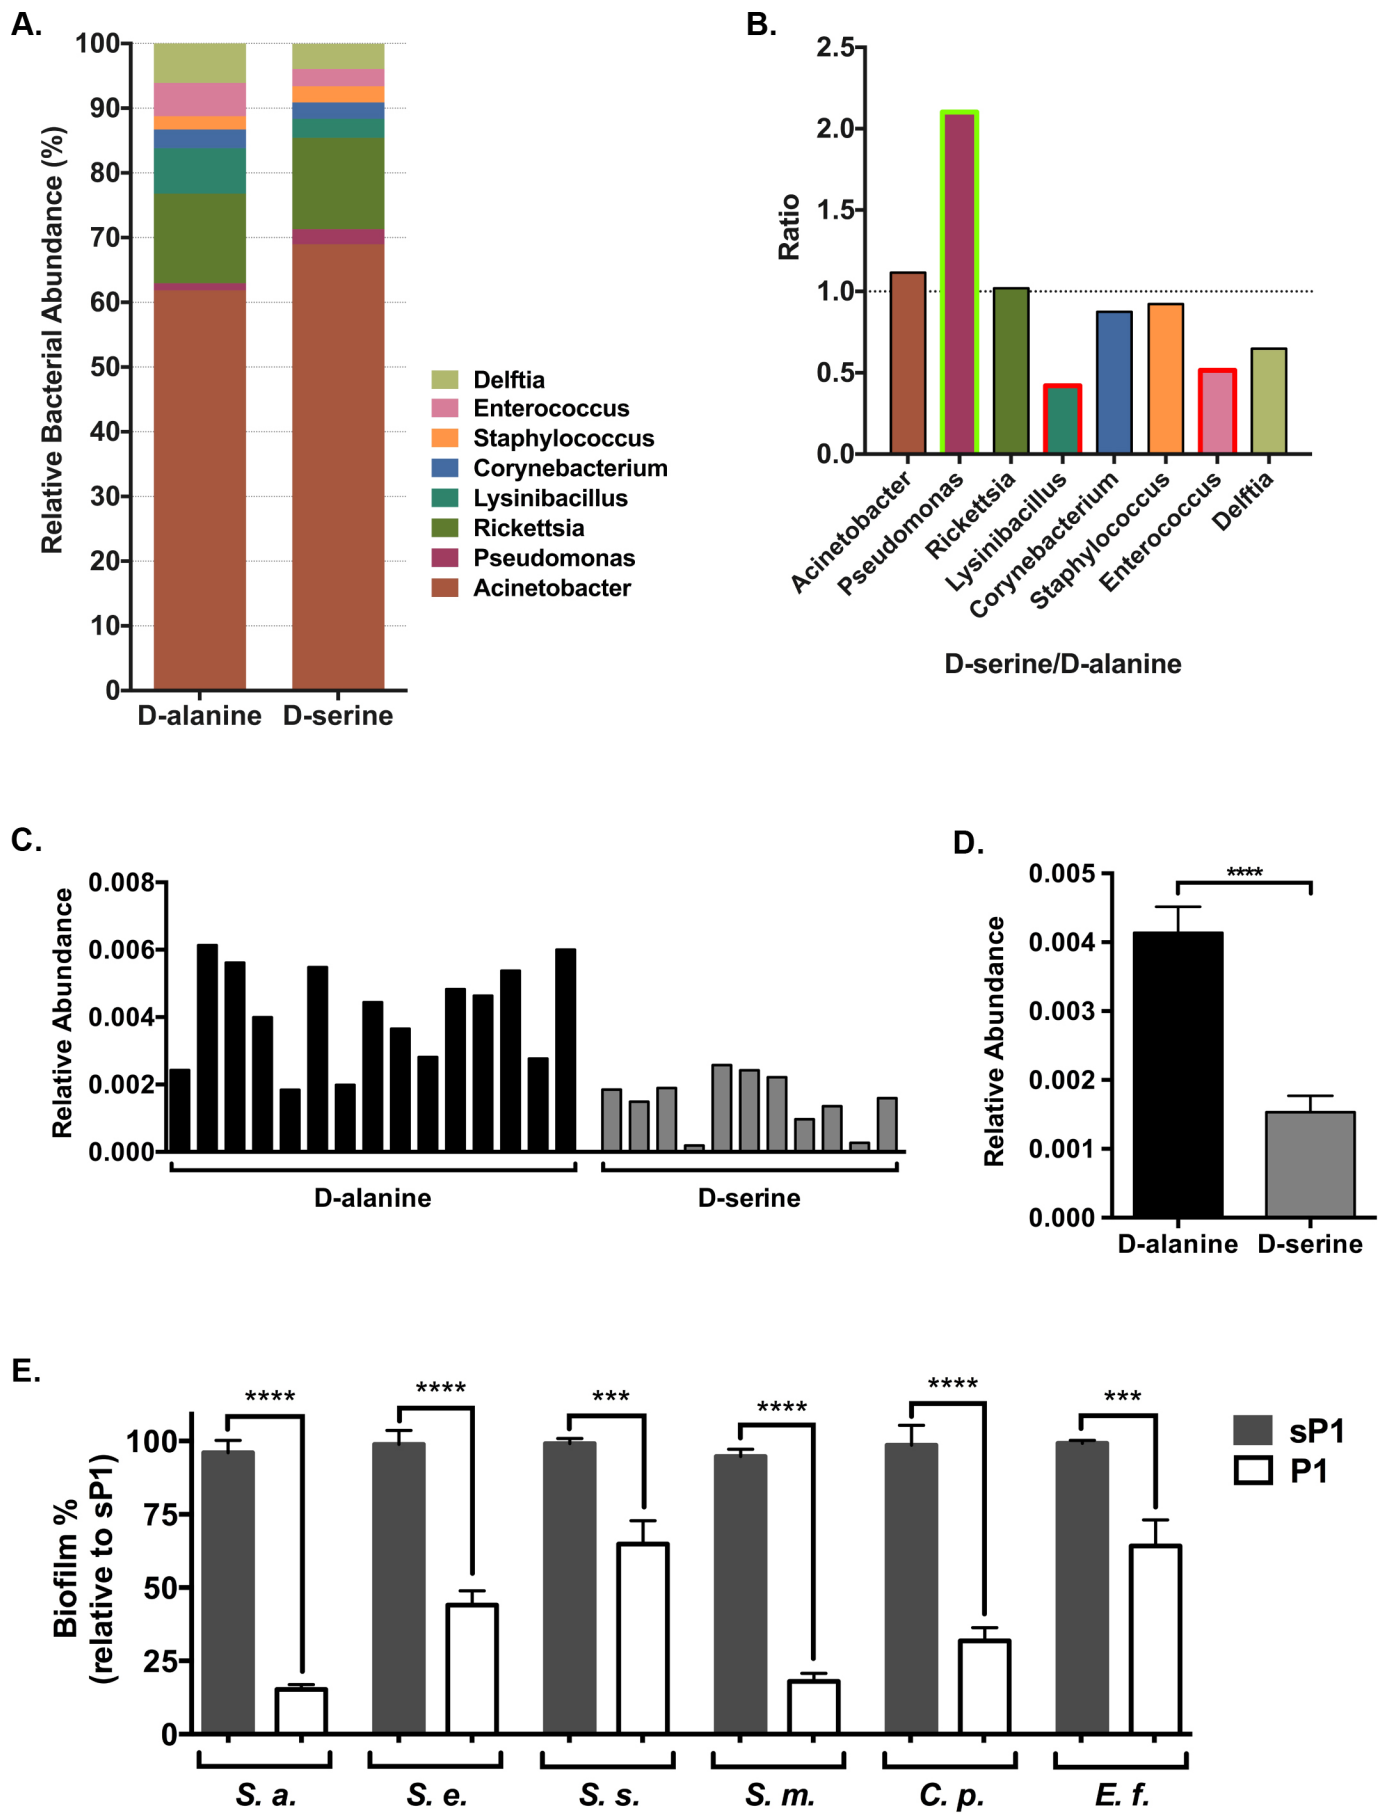

Figure S8.

A.

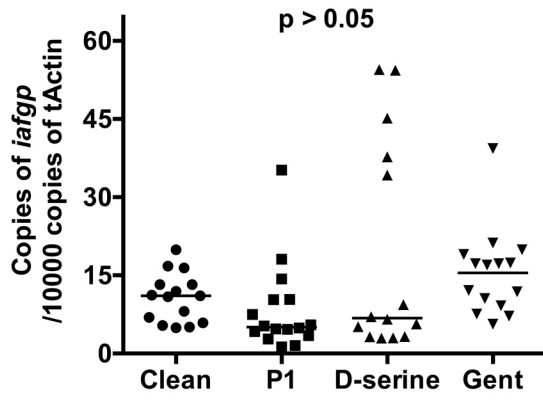

B.

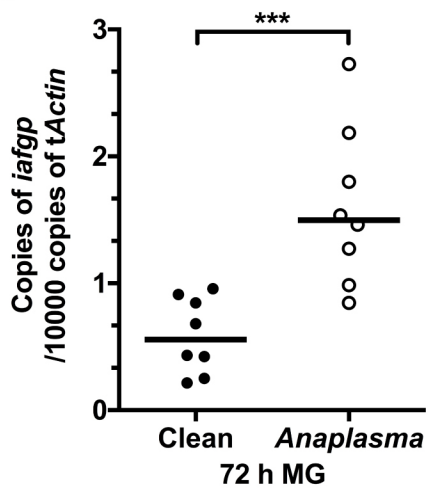

C.

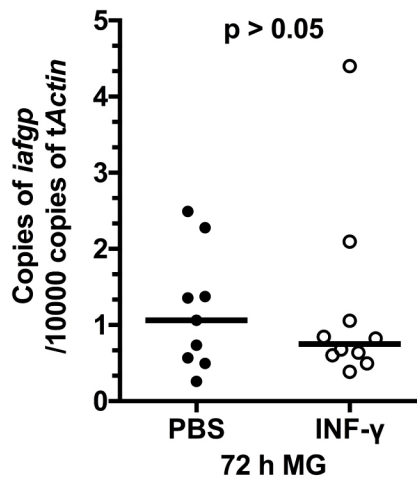

Figure S9.

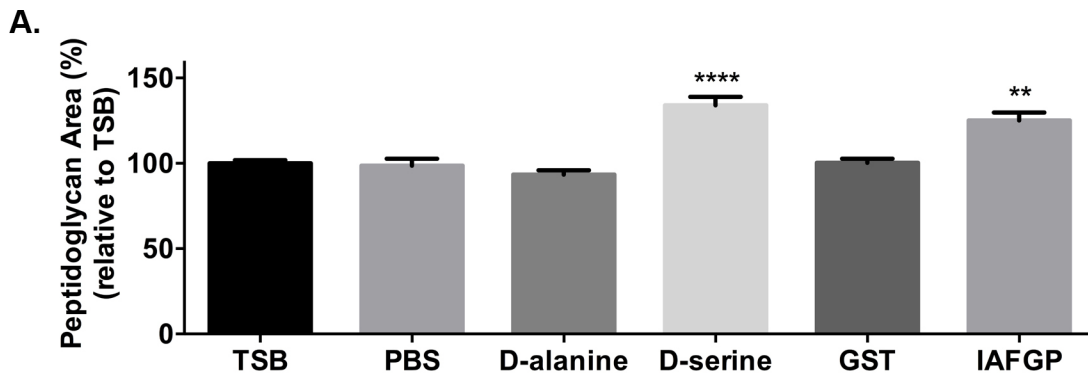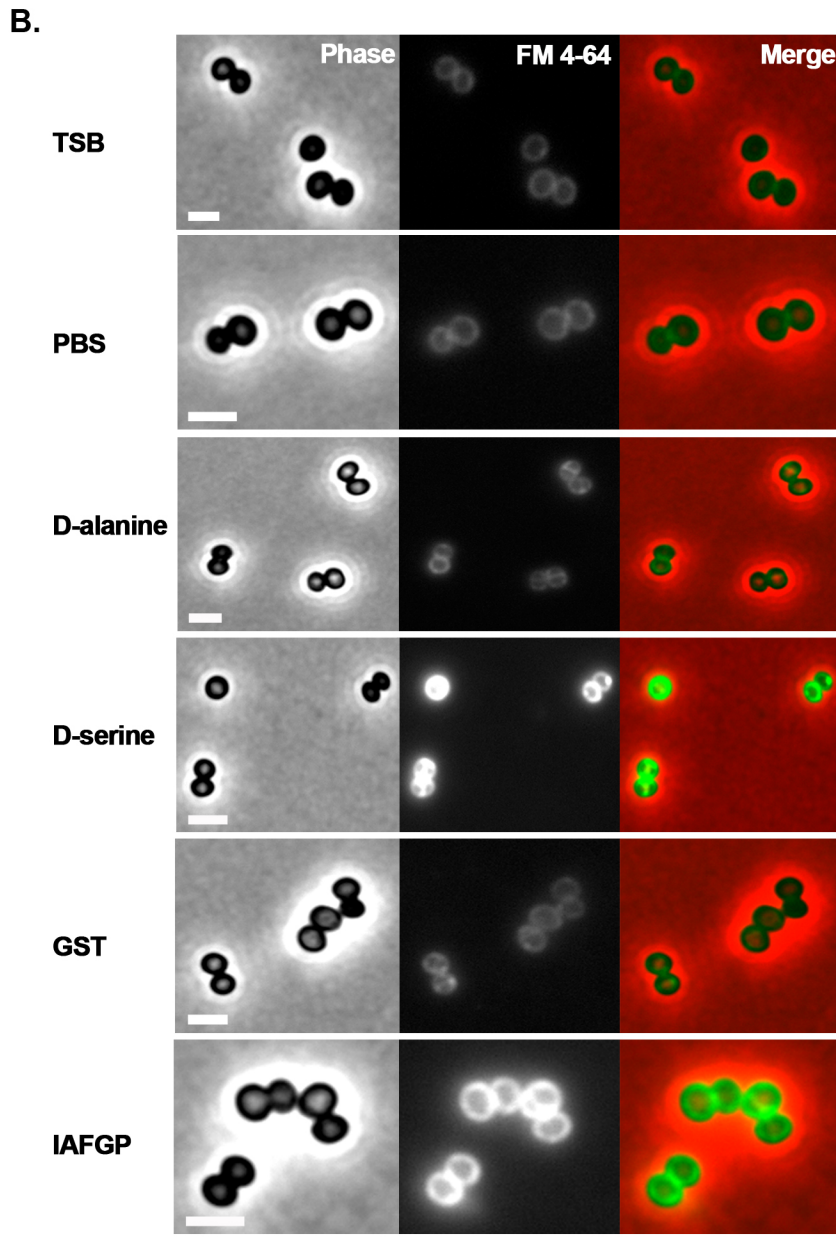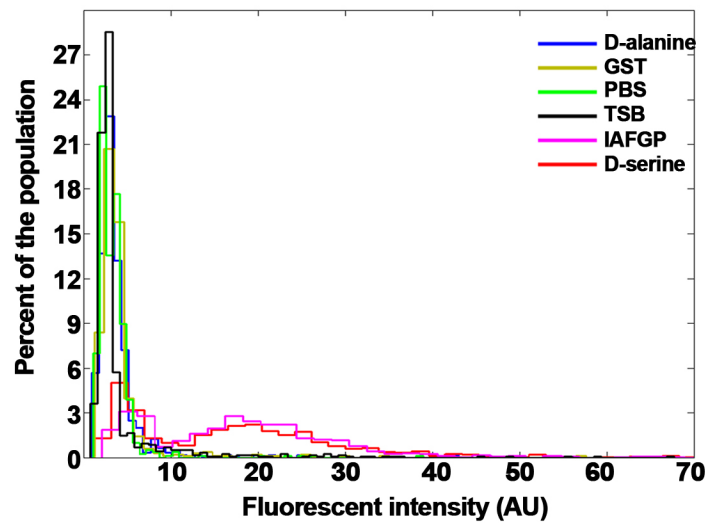

Figure S10.

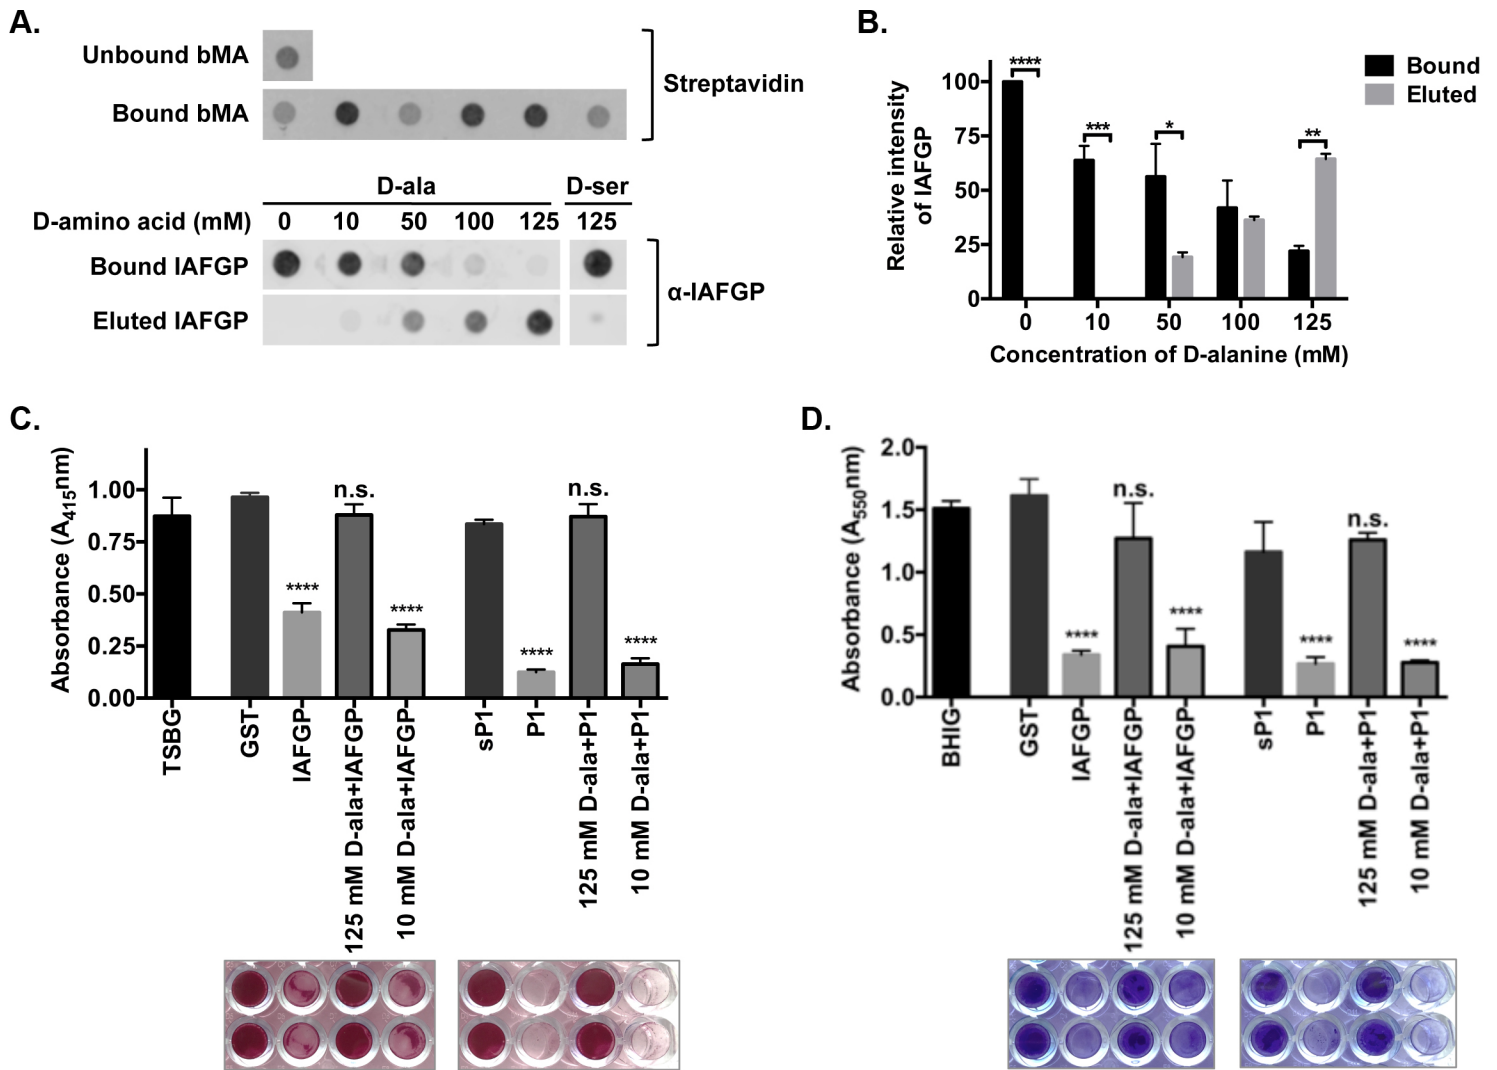

Figure S11.

A.

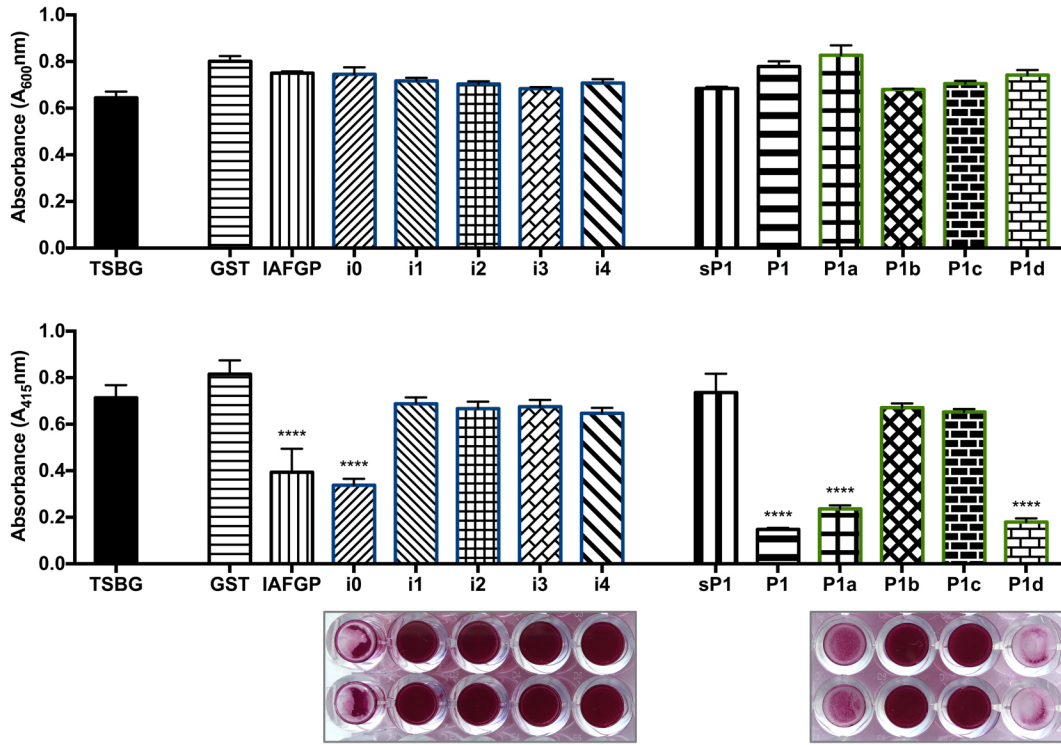

B.

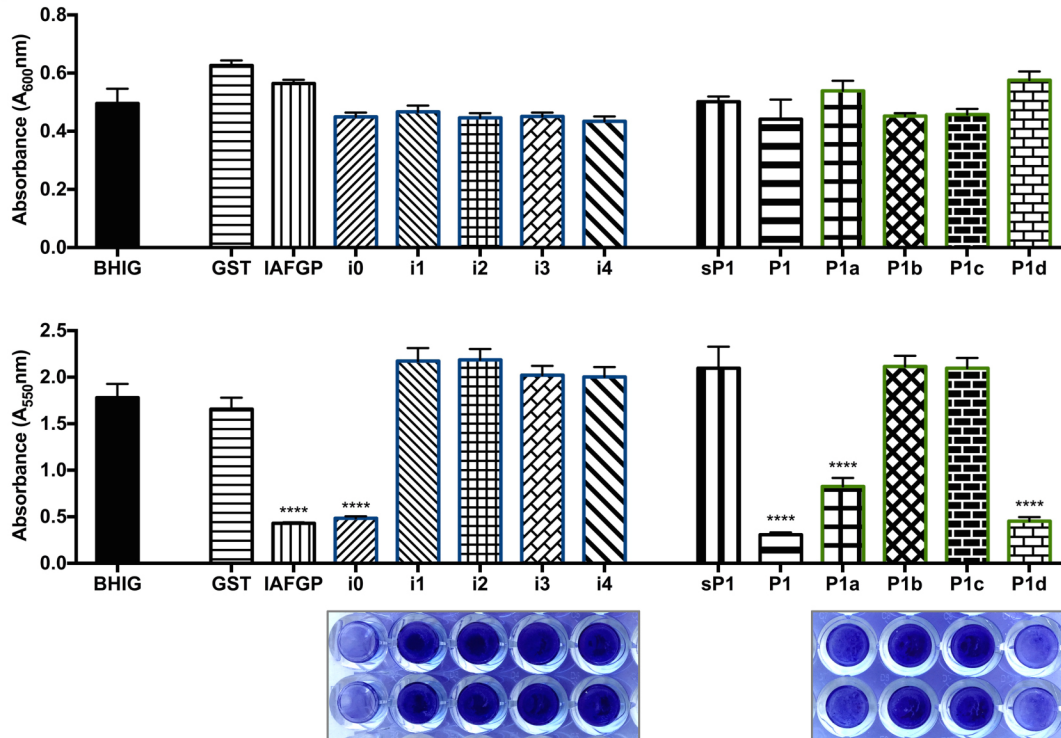

Figure S12.

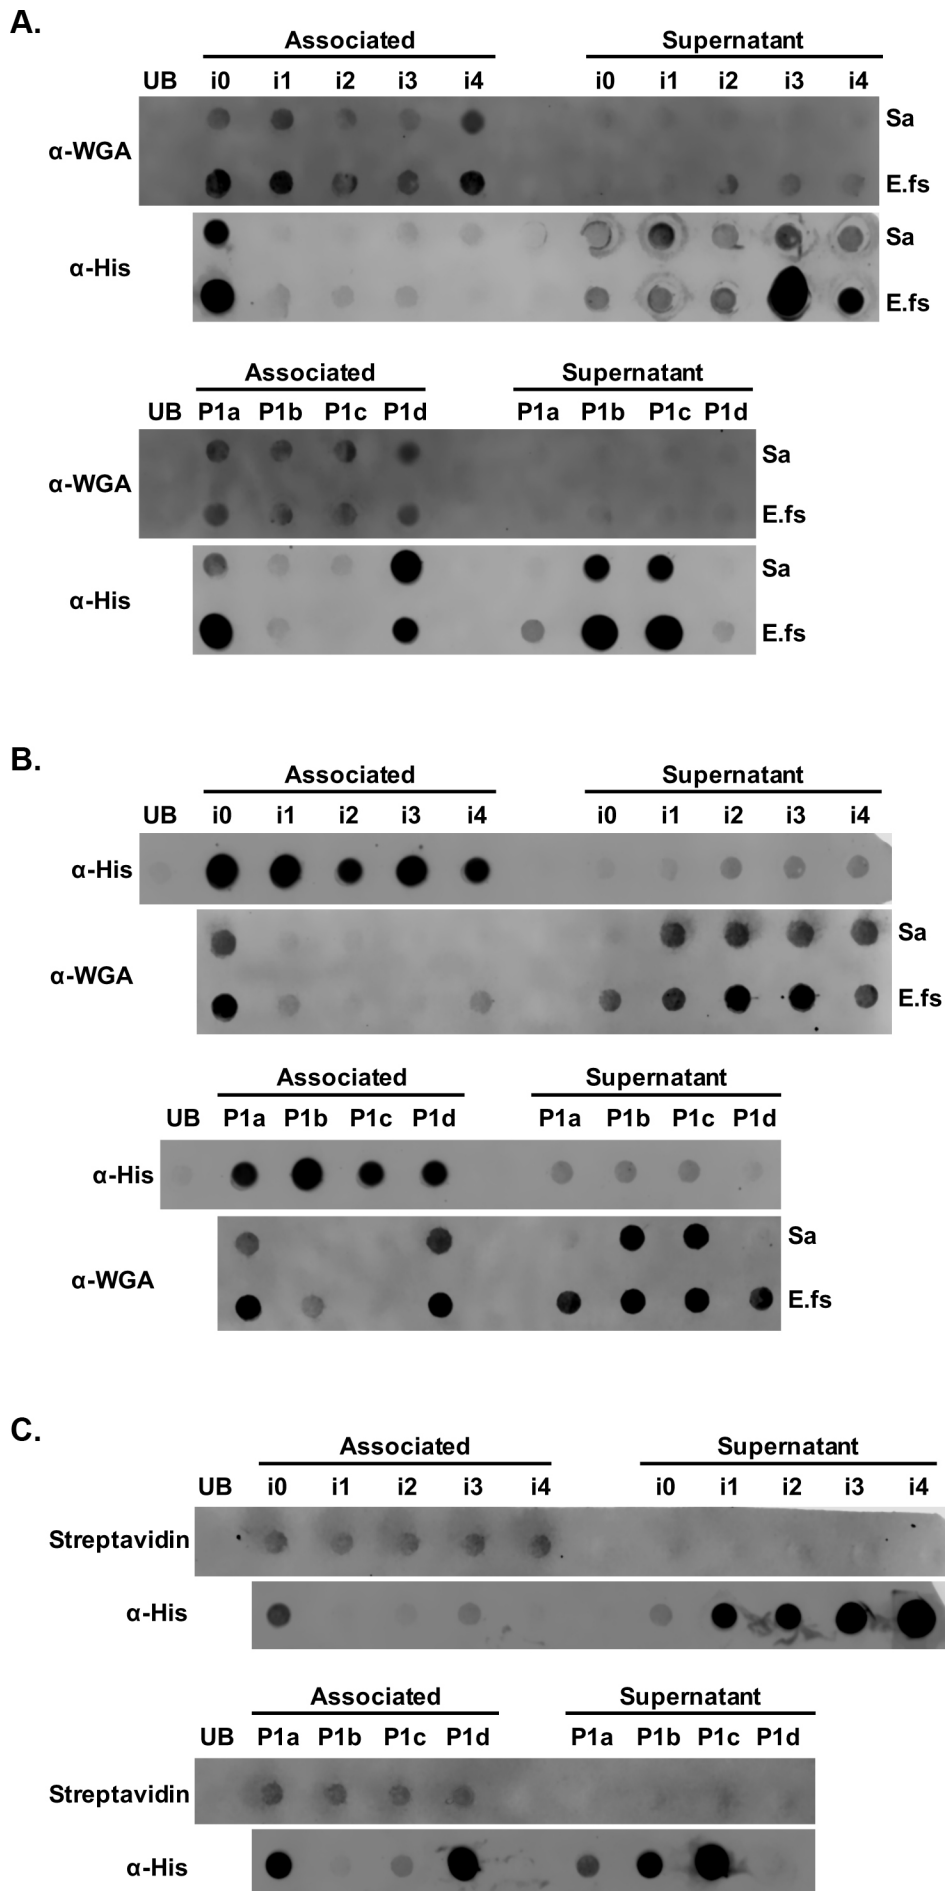

Supplement: pnas.1613422114.sapp.pdf [file pnas.1613422114.sapp.pdf]
